## 1            **Tumour mutations in long noncoding RNAs enhance cell fitness**

2

3    Roberta Esposito\*<sup>1,2,3</sup>, Andrés Lanzós\*<sup>1,2,4</sup>, Taisia Polidori <sup>1,2</sup>, Hugo Guillen-Ramirez <sup>5,6</sup>,  
4    Bernard Mefi Merlin <sup>1,2</sup>, Lia Mela <sup>1,2</sup>, Eugenio Zoni <sup>2,9</sup>, Isabel Büchi <sup>2,8</sup>, Lusine  
5    Hovhannisyán <sup>2,7</sup>, Finn McCluggage <sup>10,11</sup>, Matúš Medo <sup>2,7</sup>, Giulia Basile <sup>1,2</sup>, Dominik F.  
6    Meise <sup>1,2</sup>, Sunandini Ramnarayanan <sup>5,6</sup>, Sandra Zwyszig <sup>1,2</sup>, Corina Wenger <sup>1,2</sup>, Kyriakos  
7    Schwarz <sup>1,2</sup>, Adrienne Vancura <sup>1,2</sup>, Núria Bosch-Guiteras <sup>1,2,4</sup>, Marianna Kruithof-de Julio  
8    2,9, Yitzhak Zimmer <sup>2,7</sup>, Michaela Medová <sup>2,7</sup>, Deborah Stroka <sup>2,8</sup>, Archa Fox <sup>10,11</sup>, Rory  
9    Johnson <sup>1,2,5,6</sup>

10

11    1.Department of Medical Oncology, Inselspital, Bern University Hospital, University of Bern, 3010 Bern, Switzerland.

12    2.Department for BioMedical Research, University of Bern, 3008 Bern, Switzerland

13    3.Institute of Genetics and Biophysics "Adriano Buzzati-Traverso", CNR, 80131 Naples, Italy.

14    4.Graduate School of Cellular and Biomedical Sciences, University of Bern, 3012 Bern, Switzerland.

15    5.School of Biology and Environmental Science, University College Dublin, Dublin D04 V1W8, Ireland.

16    6.Conway Institute for Biomolecular and Biomedical Research, University College Dublin, Dublin D04 V1W8,  
17    Ireland.

18    7.Department of Radiation Oncology, Inselspital, Bern University Hospital and University of Bern, Bern, Switzerland

19    8.University Clinic of Visceral Surgery and Medicine, Bern University Hospital, Inselspital, Department of Biomedical  
20    Research, University of Bern, Bern, Switzerland.

21    9.Department of Urology, Inselspital, Bern University Hospital, Bern, Switzerland.

22    10.School of Molecular Sciences, University of Western Australia, Crawley, Western Australia, Australia.

23    11.School of Human Sciences, University of Western Australia, Crawley, Western Australia, Australia.

24

25    \* Equal contribution

26    Correspondence: [rory.johnson@ucd.ie](mailto:rory.johnson@ucd.ie); [roberta.esposito@dbmr.unibe.ch](mailto:roberta.esposito@dbmr.unibe.ch)

27

28    Keywords: Cancer; Mutations; Long Non-Coding RNA; LncRNA; Cancer Driver Genes; Pan-  
29    Cancer Analysis of Whole Genomes; CRISPR; NEAT1.

30

31 **Abstract**

32 Long noncoding RNAs (lncRNAs) can act as tumour suppressors or oncogenes to  
33 repress/promote tumour cell proliferation via RNA-dependent mechanisms. Recently, genome  
34 sequencing has identified elevated densities of tumour somatic single nucleotide variants  
35 (SNVs) in lncRNA genes. However, this has been attributed to phenotypically-neutral  
36 “passenger” processes, and the existence of positively-selected fitness-altering “driver” SNVs  
37 acting via lncRNAs has not been addressed. We developed and used *ExInAto2*, an improved  
38 driver-discovery pipeline, to map pancancer and cancer-specific mutated lncRNAs across an  
39 extensive cohort of 2583 primary and 3527 metastatic tumours. The 54 resulting lncRNAs are  
40 mostly linked to cancer for the first time. Their significance is supported by a range of clinical  
41 and genomic evidence, and display oncogenic potential when experimentally expressed in  
42 matched tumour models. Our results revealed a striking SNV hotspot in the iconic *NEAT1*  
43 oncogene, which was ascribed by previous studies to passenger processes. To directly  
44 evaluate the functional significance of *NEAT1* SNVs, we used *in cellulo* mutagenesis to  
45 introduce tumour-like mutations in the gene and observed a consequent increase in cell  
46 proliferation in both transformed and normal backgrounds. Mechanistic analyses revealed that  
47 SNVs alter *NEAT1* ribonucleoprotein assembly and boost subnuclear paraspeckles. This is  
48 the first experimental evidence that mutated lncRNAs can contribute to the pathological fitness  
49 of tumour cells.

## 50 Introduction

51

52 Tumours arise and develop via somatic mutations that confer a fitness advantage on  
53 cells <sup>1</sup>. Such “driver” mutations exert their phenotypic effect by altering the function of genes  
54 or genomic elements, and are characterised by signatures of positive evolutionary selection <sup>2</sup>.  
55 This is complicated by numerous “passenger” mutations, which do not impact cell phenotype  
56 and are evolutionarily neutral <sup>3</sup>. Identification of driver mutations, and the “driver genes”  
57 through which they act, is a critical step towards understanding and treating cancer <sup>1,4</sup>.

58 Most tumours are characterised by a limited and recurrent sequence of driver mutations,  
59 which promote disease hallmarks via functional changes to encoded oncogene or tumour  
60 suppressor proteins. However, the vast majority of somatic single nucleotide variants (SNVs)  
61 fall outside protein-coding genes <sup>5</sup>. Combined with increasing awareness of the disease roles  
62 of noncoding genomic elements <sup>6</sup>, this naturally raises the question of whether non-protein  
63 coding mutations can also shape cancer cell fitness <sup>7</sup>. Growing numbers of both theoretical <sup>8–</sup>  
64 <sup>13</sup> and experimental studies <sup>2,14–17</sup> implicate noncoding SNVs in cell fitness by altering the  
65 function of elements such as enhancers, promoters, insulator elements and small RNAs <sup>18</sup>.

66 Surprisingly, one important class of cancer-promoting noncoding genes has been largely  
67 overlooked: long noncoding RNAs (lncRNAs) <sup>19</sup>. LncRNA transcripts are modular assemblages  
68 of functional elements that can interact with other nucleic acids and proteins via defined  
69 sequence or structural elements<sup>20,21</sup>. Of the >50,000 loci mapped in the human genome <sup>22</sup>,  
70 hundreds of “cancer-lncRNAs” have been demonstrated to act as oncogenes or tumour  
71 suppressors <sup>23</sup>. Their clinical importance is further supported by copy number variants (CNVs)  
72 <sup>24–26</sup>, tumour-initiating transposon screens in mouse <sup>27</sup> and function-altering germline cancer  
73 variants <sup>28</sup>.

74 We and others have previously reported statistical evidence for positively-selected SNVs  
75 in lncRNAs <sup>2,29,30</sup>. For example, *NEAT1* lncRNA, which is a structural component of subnuclear  
76 paraspeckle bodies, has been noted for its high mutation rate across a variety of cancers  
77 <sup>29,31,32</sup>. This raises the possibility that a subset of cancer-lncRNAs may also act as “driver-  
78 lncRNAs”, where SNVs promote cell fitness by altering lncRNA activity. However, most studies  
79 have argued that mutations in *NEAT1* and other lncRNAs arise from phenotypically-neutral  
80 passenger effects <sup>2,29</sup>. To date, the fitness effects of lncRNA SNVs have not been investigated  
81 experimentally.

82           In the present study, we investigate the existence of driver-lncRNAs. We develop an  
83 enhanced lncRNA driver discovery pipeline, and use it comprehensively map candidate driver-  
84 lncRNAs across the largest cohort to date of somatic SNVs from both primary and metastatic  
85 tumours. We evaluate the clinical and genomic properties of these candidates. Finally, we  
86 employ a range of functional and mechanistic assays to gather the first experimental evidence  
87 for fitness-altering driver mutations acting through lncRNAs.

## 88 **Results**

89

### 90 **Integrative driver lncRNA discovery with ExInAtoR2**

91 Driver genes can be identified by signals of positive selection acting on their somatic  
92 mutations. The two principal signals are *mutational burden* (MB), an elevated mutation rate,  
93 and *functional impact* (FI), the degree to which mutations are predicted to alter encoded  
94 function. Both signals must be compared to an appropriate background, representing  
95 mutations under neutral selection.

96 To search for lncRNAs with evidence of driver activity, we developed *ExInAtoR2*, a driver-  
97 discovery pipeline with enhanced sensitivity due to two key innovations: integration of both MB  
98 and FI signals, and empirical background estimation (see Methods) (Figure 1a, Supplementary  
99 Figure 1a, b). For MB, local background rates are estimated, controlling for covariates of  
100 mutational signatures and large-scale effects such as replication timing, which otherwise can  
101 confound driver gene discovery<sup>33</sup>. For FI, we adopted functionality scores from the *Combined*  
102 *Annotation Dependent Depletion* (CADD) system, due to its widespread use and compatibility  
103 with a range of gene biotypes<sup>34</sup>. Importantly, *ExInAtoR2* remains agnostic to the biotype of  
104 genes / functional elements, allowing independent benchmarking with established protein-  
105 coding gene data.

Figure 1

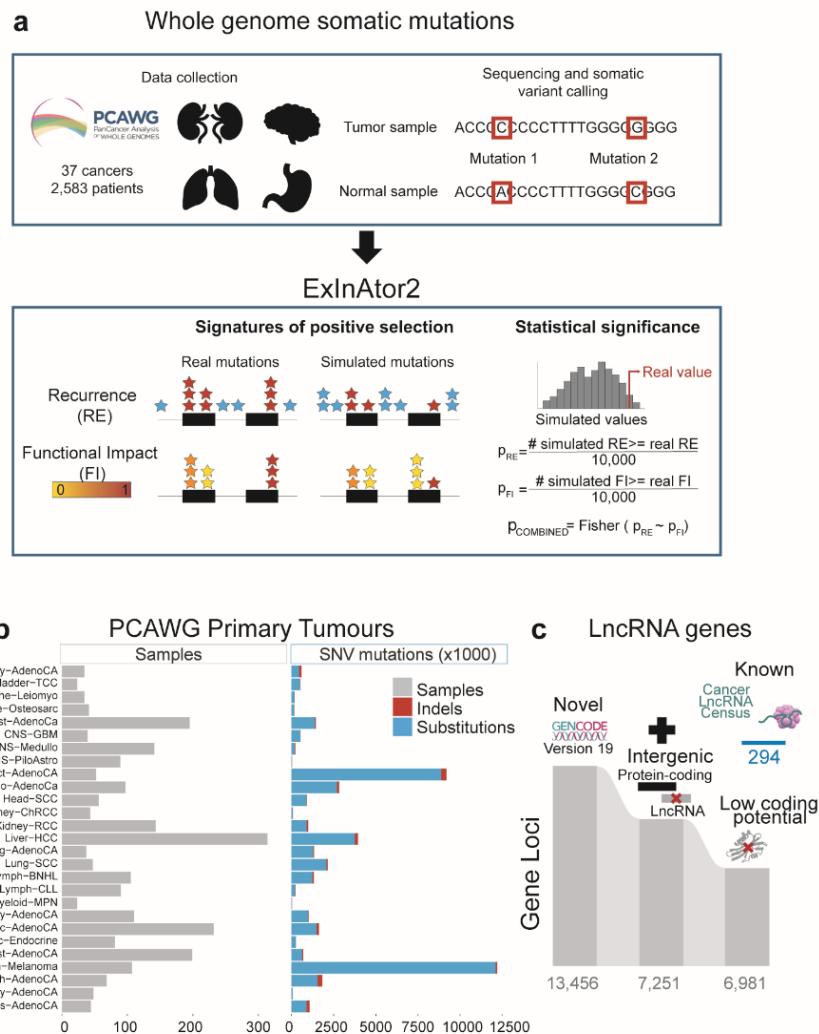

106

107 **Figure 1- Driver lncRNA discovery with ExInAtoR2**

108 **a)** ExInAtoR2 accepts input in the form of maps of single nucleotide variants (SNVs) from cohorts of  
 109 tumour genomes. Two signatures of positive selection are evaluated and compared to simulated local  
 110 background distributions, to evaluate statistical significance. The two significance estimates are  
 111 combined using Fisher's method. **b)** Summary of the primary tumour datasets used here, obtained from  
 112 Pancancer Analysis of Whole Genomes (PCAWG) project. **c)** A filtered lncRNA gene annotation was  
 113 prepared, and combined with a set of curated cancer lncRNAs from the Cancer lncRNA Census<sup>23</sup>.

114

115 **Accurate discovery of known and novel driver genes**

116 We began by benchmarking ExInAto2 using the maps of somatic single nucleotide  
117 variants (SNVs) from tumour genomes sequenced by the recent PanCancer Analysis of Whole  
118 Genomes (PCAWG) project <sup>1</sup>, comprising altogether 45,704,055 SNVs from 2,583 donors  
119 (Figure 1b, Methods). As it was generated from whole-genome sequencing (WGS), this  
120 dataset makes it possible to search for driver genes amongst both non-protein-coding genes  
121 (including lncRNAs) and better-characterised protein-coding genes.

122 To maximise sensitivity and specificity, we prepared a carefully-filtered annotation of  
123 lncRNAs. Beginning with high-quality curations from GenCode <sup>35</sup>, we isolated intergenic  
124 lncRNAs lacking evidence for protein-coding capacity. To the resulting set of 6981 genes  
125 (Figure 1c), we added the set of 294 confident, literature-curated lncRNAs from Cancer  
126 lncRNA Census 2 dataset <sup>23</sup>, for a total set of 7275 genes.

127 We compared the performance of ExInAto2 to ten leading driver discovery methods and  
128 PCAWG's consensus measure, which integrates and outperforms these individual methods  
129 (Figure 2a) <sup>32</sup>. Performance was benchmarked on curated sets of protein-coding and lncRNA  
130 cancer genes (Figure 2b). Judged by correct identification of cancer lncRNAs at a false  
131 discovery rate (FDR) cutoff of <0.1, ExInAto2 displayed the best overall accuracy in terms of  
132  $F_1$  measure (Figure 2c, d). Quantile-quantile (QQ) analysis of resulting  $p$ -values ( $P$ ) displayed  
133 no obvious inflation or deflation and has amongst the lowest Mean Log Fold Change (MLFC)  
134 values (Figure 2e), together supporting ExInAto2's low and controlled FDR.

135 ExInAto2 is biotype-agnostic, and protein-coding driver datasets are highly refined  
136 (Figure 2b). To further examine its performance, we evaluated sensitivity for known protein-  
137 coding drivers from the benchmark Cancer Gene Census <sup>36</sup>. Again, ExInAto2 displayed  
138 competitive performance, characterised by low false positive predictions (Supplementary  
139 Figure 2a-c).

140 To test ExInAto2's FDR estimation, we repeated the lncRNA analysis on a set of  
141 carefully-randomised pancancer SNVs (see Methods). Reassuringly, no hits were discovered  
142 and QQ plots displayed neutral behaviour (MLFC 0.08) (Supplementary Figure 2d). Analysing  
143 at the level of individual cohorts, ExInAto2 predicted 3 / 40 lncRNA-cohort associations in the  
144 simulated / real datasets, respectively. This corresponds to an empirical FDR rate of 0.075,  
145 consistent with the nominal FDR cutoff of 0.1.

146 We conclude that ExInAto2 identifies known driver genes with a low and controlled false  
147 discovery rate.

Figure 2

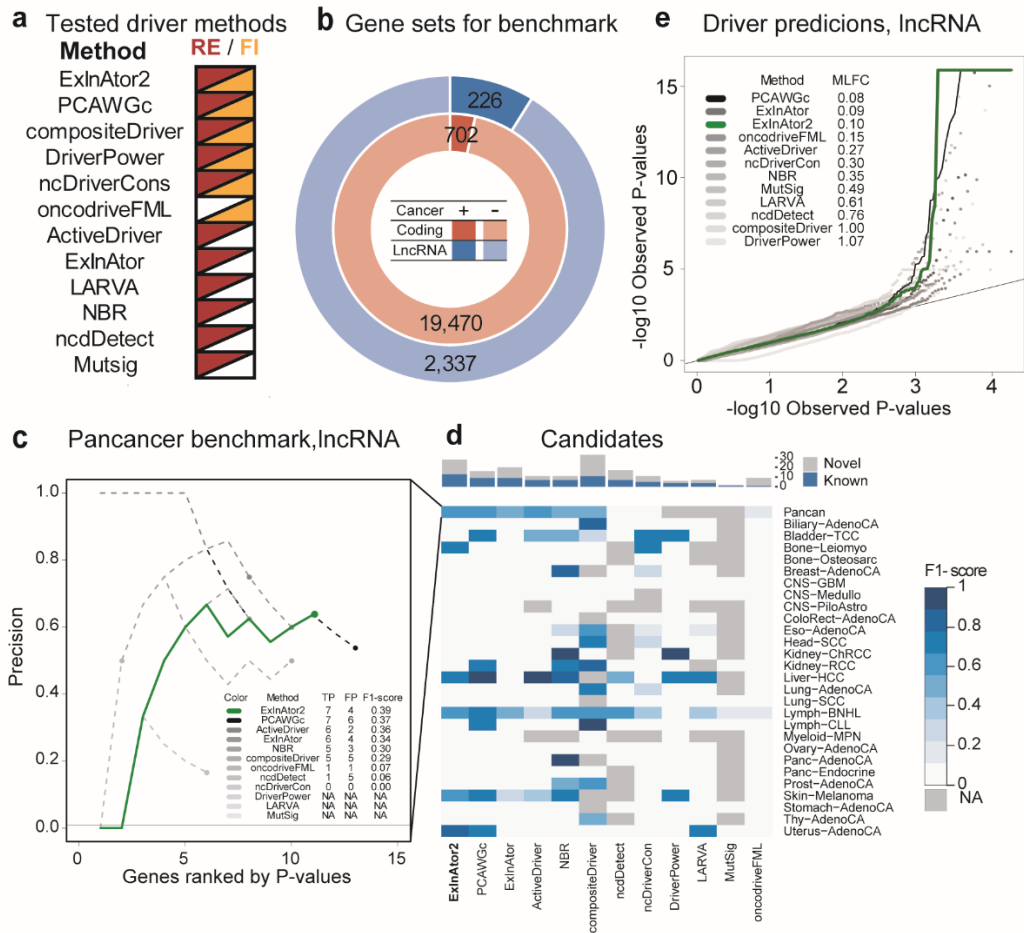

148

149 **Figure 2. ExInAtoR2 accurately identifies driver genes**

150 **a)** The list of driver discovery methods to which ExInAtoR2 was compared. The signatures of positive  
151 selection employed by each method are indicated to the right. PCAWGc indicates the combined driver  
152 prediction method from Pan-Cancer Analysis of Whole Genomes (PCAWG), which integrates all ten  
153 methods. **b)** Benchmark gene sets. LncRNAs (blue) were divided in positives and negatives according  
154 to their presence or not in the Cancer LncRNA Census<sup>23</sup>, respectively, and similarly for protein-coding  
155 genes in the Cancer Gene Census<sup>36</sup>. **c)** Comparing performance in terms of precision in identifying true  
156 positive known cancer lncRNAs from the CLC dataset, using PCAWG Pancancer cohort. x-axis: genes  
157 sorted by increasing  $p$ -value. y-axis: precision, being the percentage of true positives amongst  
158 cumulative set of candidates at increasing  $p$ -value cutoffs. Horizontal black line shows the baseline,  
159 being the percentage of positives in the whole list of tested genes. Coloured dots represent the precision  
160 at cutoff of  $q \leq 0.1$ . Inset: Performance statistics for cutoff of  $q \leq 0.1$ . **d)** Driver prediction performance  
161 for all methods in all PCAWG cohorts. Cells show the F1-score of each driver method (x-axis) in each  
162 cohort (y-axis). Grey cells correspond to cohorts where the method was not run. The bar plot on the top  
163 indicates the total, non-redundant number of True Positives (TP) and False Positives (FP) calls by each  
164 method. Driver methods are sorted from left to right according to the F1-score of unique candidates.



165 e) Evaluation of  $p$ -value distributions for driver lncRNA predictions. Quantile-quantile plot (QQ-plot)  
166 shows the distribution of observed vs expected  $-\log_{10} p$ -values for each method run on the PCAWG  
167 Pancancer cohort. The Mean Log-Fold Change (MLFC) quantifies the difference between observed and  
168 expected values (Methods).

169

## 170 **The landscape of driver lncRNA in primary human tumours**

171 We next set out to create a genome-wide panorama of mutated lncRNAs across human  
172 primary cancers. Tumours from PCAWG were grouped into a total of 37 cohorts, ranging in  
173 size from two tumours (Cervix-AdenoCa, Lymph-NOS and Myeloid-MDS tumour types) to 314  
174 (Liver-HCC tumour type), in addition to the entire pancancer set (Figure 3a).

175 After removing likely false positive associations using the same stringent criteria as  
176 PCAWG<sup>1</sup>, ExInAto2 revealed altogether 21 unique cancer-lncRNA associations, involving 17  
177 lncRNAs (Figure 3b) – henceforth considered putative “driver lncRNAs”. Of these, nine are  
178 annotated lncRNAs that have not previously been linked to cancer, denoted “novel”. The  
179 remaining “known” candidates are identified in the literature-curated Cancer LncRNA Census  
180 2 dataset<sup>23</sup>. Known lncRNAs tend to be hits in more individual cohorts than novel lncRNAs,  
181 with cases like *NEAT1* being detected in four cohorts (Figure 3b). While most driver lncRNAs  
182 display exonic mutation rates ~50-fold greater than background (coloured cells, Figure 3b), the  
183 number of mutations in such genes is diverse between cohorts, being Pancancer, Lymph-CLL  
184 and Skin-Melanoma the biggest contributors of mutations.

185 Supporting the accuracy of these predictions, the set of driver lncRNAs is highly enriched  
186 for known cancer lncRNAs<sup>23</sup> (8/17 or 48%, Fisher test  $P=2e-6$ ) (Figure 3c). Driver lncRNAs  
187 are also significantly enriched in three other independent literature-curated databases  
188 (Supplementary Figure 3a).

189

## 190 **Driver lncRNAs carry features of functionality and clinical relevance**

191 To further evaluate the quality of driver lncRNA predictions, we tested their association  
192 with genomic and clinical features expected of *bona fide* cancer genes. lncRNA catalogues  
193 are likely to contain a mixture of both functional and non-functional genes. The former group  
194 is characterised by purifying evolutionary selection and high expression in healthy and  
195 diseased tissues<sup>27</sup>. We found that driver lncRNAs display higher evolutionary sequence  
196 conservation and higher steady-state levels in healthy organs (Figure 3d). Their sequence also  
197 contains more microRNA binding sites, suggesting integration with post-transcriptional  
198 regulatory networks.

199 In contrast, we could find no evidence that driver lncRNAs are enriched for genomic  
200 covariates and features arising from artefactual results. They have earlier replication timing  
201 (whereas later replication is associated with greater mutation)<sup>37</sup>, less exonic repetitive  
202 sequence (ruling out mappability biases), and similar exonic GC content (ruling out sequencing  
203 bias) compared to tested non-candidates (Figure 3d). However, driver lncRNAs tend to have  
204 longer spliced length, likely reflecting greater statistical power for longer genes that affects all  
205 driver methods<sup>29</sup>.

206 Driver lncRNAs also have clinical features of cancer genes (Figure 3e). They are on  
207 average 158-fold higher expressed in tumours compared to normal tissues (133 vs 0.84 FPKM)  
208 (Figure 3e, PCAWG RPKM), 2.15-fold enriched for germline cancer-associated small  
209 nucleotide polymorphism (SNP) in their gene body (4.7% vs 2.5%) (Figure 3e, SNPs per MB),  
210 and enriched in orthologues of driver lncRNAs carrying common insertion sites (CIS),  
211 discovered by transposon insertional mutagenesis (TIM) screens in mouse IM screens identify  
212 (17.6 vs 1.6%) (Supplementary Figure 3a)<sup>23</sup>. Finally, driver lncRNAs significantly overlap  
213 growth-promoting hits discovered by CRISPR functional screens (11.8 vs 1.3%)  
214 (Supplementary Figure 3a). In conclusion, driver lncRNA display evidence for functionality  
215 across a wide range of functional and clinical features, strongly suggesting that they are  
216 enriched for *bona fide* cancer driver genes.

Figure 3

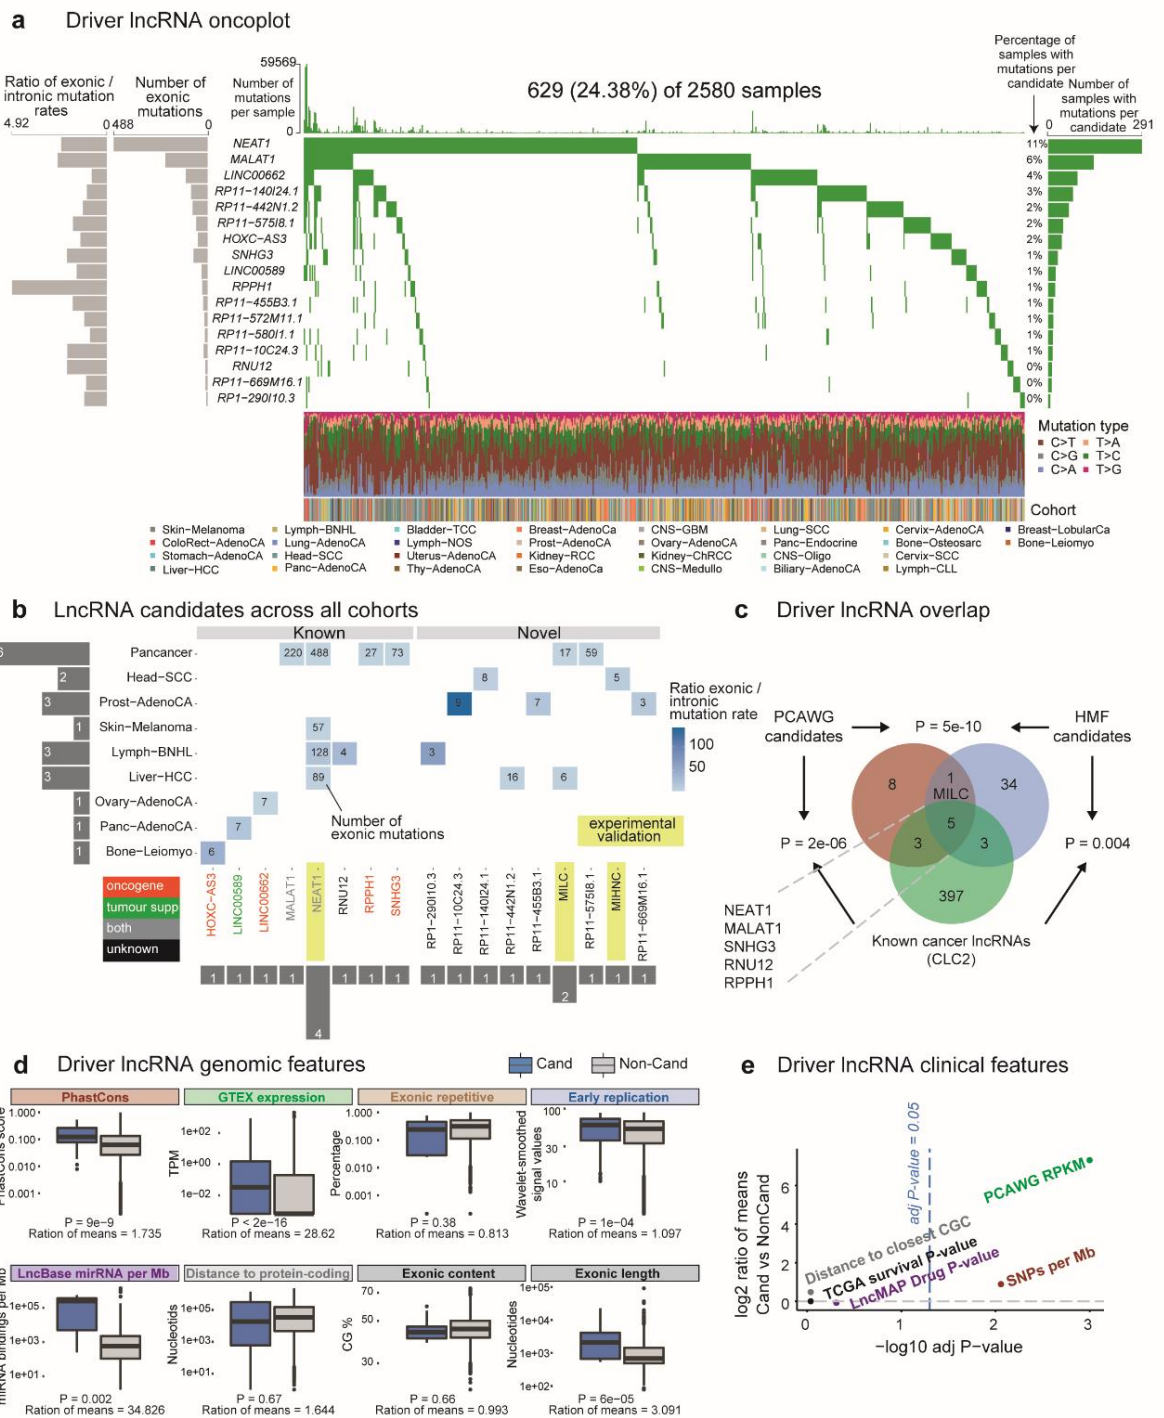

217

218

219 **Figure 3. The landscape of known and novel driver lncRNAs in primary tumors**

220 a) "Oncoplot" overview of driver lncRNA analysis in PCAWG primary tumours. Rows: 17 candidate driver  
 221 lncRNAs at cutoff of  $q \leq 0.1$ . Columns: 2580 tumours. b) LncRNA candidates across all cohorts. Rows:  
 222 Cohorts where hits were identified. Columns: 17 candidate driver lncRNAs. "Known" lncRNAs are part  
 223 of the literature-curated Cancer lncRNA Census (CLC2) dataset<sup>23</sup>. Functional labels (oncogene /  
 224 tumour suppressor / both) were also obtained from the same source.

225 **c)** Intersection of candidate driver lncRNAs identified in PCAWG primary tumours, Hartwig Medical  
226 Foundation (HMF) metastatic tumours and the CLC2 set. Statistical significance was estimated by  
227 Fisher's exact test. **d)** Genomic features of driver lncRNAs. Each plot displays the values of indicated  
228 features for 17 candidate driver lncRNAs (blue) and all remaining tested lncRNAs (non-candidates,  
229 grey). Significance was calculated using Wilcoxon test. For each comparison, the ratio of means was  
230 calculated as (mean of candidate values / mean of non-candidate values). See Methods for more details.  
231 **e)** Clinical features of driver lncRNAs. Each point represents the indicated feature. y-axis: log2-  
232 transformed ratio of the mean candidate value and mean non-candidate value. x-axis: The statistical  
233 significance of candidate vs non-candidate values, as estimated by Wilcoxon test and corrected for  
234 multiple testing. See Methods for more details.

235

### 236 **The landscape of lncRNA drivers in metastatic tumours**

237 We further extended the driver lncRNA landscape to metastatic tumours, using 3,527  
238 genomes from 31 cohorts sequenced by the Hartwig Medical Foundation (Supplementary  
239 Figure 3 b-d) <sup>38</sup>. Performing a similar analysis as above, we identified 43 driver lncRNAs in a  
240 total of 53 lncRNA-tumour combinations (Supplementary Figure 3b). Eight predicted drivers  
241 are known cancer lncRNAs, significantly higher than random expectation (P=0.004) (Figure  
242 3c). Further adding confidence to these findings is the significant overlap of driver lncRNAs  
243 identified in the metastatic and primary tumour cohorts (Figure 3c).

244

### 245 **Driver mutations identify oncogenic lncRNAs with therapeutic potential**

246 We wished to evaluate the therapeutic and functional relevance of novel lncRNAs  
247 identified by driver analysis. ENSG00000241219 (RP11-572M11.1), herein named *MILC*  
248 (Mutated in Liver Cancer) displayed elevated mutation rates in Hepatocellular Carcinoma  
249 (HCC) tumours (Figure 4a) and has been detected as driver in both the PCWG and HFM  
250 datasets. It has, to our knowledge, never previously been implicated in cancer. According to  
251 the latest Gencode version 38, its single annotated isoform comprises three exons, and  
252 displays low expression in normal tissues (Supplementary Figure 4a). We could detect *MILC*  
253 in two HCC cell lines, HuH7 and SNU-475 (Figure 4c and Supplementary Figure 4c). To  
254 perturb *MILC* expression, we designed two different antisense oligonucleotides (ASOs) that  
255 reduced steady-state levels by >50% in both cell lines (Figure 4b,c and Supplementary Figure  
256 4c). We evaluated the role of *MILC* in HCC cell proliferation, by measuring changes in growth  
257 rates following ASO transfection. The significant decrease in growth resulting from both ASOs  
258 in both cell backgrounds points to the importance of *MILC* in cell fitness (Figure 4d and  
259 Supplementary Figure 4d).

260           These results prompted us to ask whether *MILC* can also promote cell growth in other  
261 cancer types. Thus, we turned to CRISPR-activation, to upregulate the lncRNA from its  
262 endogenous locus in HeLa cervical carcinoma cells. Three independent sgRNAs increased  
263 gene expression by 4 to ~20-fold (Figure 4e and Supplementary Figure 4b), of which two  
264 significantly and specifically increased cell proliferation (Figure 4f).

265           Having established that *MILC* promotes cell growth, we next asked whether tumour  
266 mutations can enhance this activity, as would be expected for driver mutations. To do so, we  
267 designed overexpression plasmids for the wild-type or mutated forms of the transcript (Figure  
268 4g). The mutated form contained four SNVs, some of them recurrently observed in  
269 independent tumours from both PCAWG and HFM dataset (Figure 4a). Transfection of wild-  
270 type *MILC* boosted cell growth, consistent with ASO results above. More important, the  
271 mutated form resulted in a significant additional increase cell proliferation, compared to the  
272 wild-type (Figure 4h).

273           Another lncRNA, *AC087463.1*, herein named *MIHNC* (Mutated in Head and Neck  
274 Cancer) was identified as a potential driver in the Head and Neck (HN) tumour cohort (Figure  
275 4i). *MIHNC* is transcribed from the same locus as the lncRNA *PWRN1*, previously reported as  
276 a tumour suppressor in gastric cancer 44. It is annotated as a single isoform with three exons  
277 (Figure 4i), with the mutations falling in the second, unique exon (Figure 4i). A similar strategy  
278 as above showed that overexpression of a mutated form carrying 5 SNVs (Figure 4j) increased  
279 tumorigenicity in HN cells, as measured by colony-forming potential (Figure 4k).

280           Together, these results show that driver analysis is capable of identifying novel  
281 oncogenic lncRNAs and, critically, their activity is enhanced by tumour mutations.



291 **d)** Populations of ASO-transfected cells were measured at indicated time points. Each measurement  
292 represents n=3 independent replicates. **e)** Overview and performance of CRISPR-activation (CRISPRa)  
293 targeting *MILC*. On the right, qRT-PCR measurements of RNA levels with indicated sgRNAs in HeLa  
294 cells. Values were normalised to the housekeeping gene *HPRT1* and to a control sgRNA targeting the  
295 *AAVS1* locus. Values represent n=3 independent replicates. **f)** The effect of CRISPRa on HeLa cells'  
296 viability, as measured by Cell Titre Glo reagent. Values represent n=6 independent replicates, and  
297 statistical significance was estimated by comparison to the Control sgRNA by paired *t*-test at the 48 hrs  
298 timepoint. **g)** Plasmids expressing spliced *MILC* sequence, in wild-type (WT) or mutated (Mut) form were  
299 transfected into HuH cells. The steady state levels of RNA were measured by qRT-PCR and normalised  
300 to cells transfected with similar EGFP-expressing plasmid. Values represent n=3 independent  
301 replicates, each one with 6 technical replicates. **h)** Populations of plasmid-transfected cells were  
302 measured at indicated timepoints. Statistical significance was estimated by one-sided Student's *t*-test  
303 based on n=3 independent replicates. **i)** The genomic locus of head and neck cancer candidate driver  
304 lncRNA *MIHNC*. Also shown are SNVs from PCAWG and Hartwig. The SNVs included in the mutated  
305 version of the plasmids are indicated in the grey boxes. **j)** Plasmids expressing spliced *MIHNC*  
306 sequence, in wild-type (WT) or mutated (Mut) form were transfected into HN5 cells. The steady state  
307 levels of RNA were measured by qRT-PCR and normalised to cells transfected with similar EGFP-  
308 expressing plasmid. Values represent n=3 independent replicates. **k)** Results of colony formation assay  
309 in HN5 cells. Values indicate the percent of well area covered. Statistical significance was estimated  
310 using One-way ANOVA has been used to determine statistical significance, based on 18 culture wells.

311

312

### 313 **Mutations in NEAT1 promote cell fitness and correlate with survival**

314 To gain mechanistic insights into how fitness-enhancing driver mutations may act  
315 through lncRNAs, we turned to a relatively well-understood lncRNA, *NEAT1*, for which  
316 confident mechanistic and functional data is available. Based on ExInAator2 analysis, *NEAT1*  
317 mutations, spanning the entire gene length, display evidence for positive selection in altogether  
318 4 and 3 cancer cohorts in PCAWG and Hartwig, respectively. PCAWG and others also noted  
319 this highly elevated mutation rate in the *NEAT1* gene, although it has been argued that these  
320 result from neutral passenger processes, possibly linked to the high expression of the gene  
321 <sup>2,31,40</sup>.

322 *NEAT1* produces short and long isoforms (called NEAT1\_1 / NEAT1\_2) of 3.7 and 22.7  
323 kb, respectively <sup>41</sup>, which are completely overlapping at the 5' of the gene (Figure 5b).  
324 NEAT1\_1 is a ubiquitous, abundant, polyadenylated and highly conserved transcript <sup>42</sup>. In  
325 contrast, NEAT1\_2, responsible for formation of membraneless nuclear paraspeckle  
326 structures, is not polyadenylated and expressed under specific conditions or in response to  
327 various forms of stress <sup>43,44</sup>.

328 We sought to test whether indels in *NEAT1* can act as drivers. We hypothesised that  
329 tumour indels could be simulated wild-type Cas9 protein, which is known to cause similar  
330 mutations when double strand breaks are resolved by error-prone DNA repair pathways<sup>15,45</sup>.  
331 We selected six regions of *NEAT1*, based on high mutation density, evolutionary conservation  
332 and known functions<sup>46</sup>, hereafter called Reg1, Reg2, etc., and targeted them with altogether  
333 15 sgRNAs (Figure 5a). To control for the non-specific fitness effects of double strand breaks  
334 (DSBs)<sup>47,48</sup>, we also created two neutral control sgRNAs targeting *AAVS1* locus, and a  
335 positive-control paired sgRNA (pgRNA) to delete the entire *NEAT1\_1* region (Figure 5b and  
336 Supplementary Figure 5a). Sequencing of treated cells' gDNA revealed narrowly-focussed  
337 substitutions and indels at target regions, similar to that observed in real tumours (Figure 5c  
338 and Supplementary Figure 5b).

339 To quantify mutations' effects on cell fitness, we established a competition assay  
340 between mutated mCherry-labelled cells and control GFP-labelled cells (Figure 5d and  
341 Supplementary Figure 5c)<sup>15</sup>. As expected, deletion of entire *NEAT1\_1* in HeLa cells led to  
342 reduced growth (KO), while control sgRNAs did not (Figure 5d). Notably, HeLa cells carrying  
343 *NEAT1* mutations in defined regions displayed increased fitness: two at the 5' of the gene  
344 (Reg2 and Reg3), one internally near the alternative polyadenylation site (Reg4) and one at  
345 the 3' end (Reg5) (blue line, Figure 5d and Supplementary Figure 5c). These findings were  
346 supported in 3/4 cases in HCT116 colorectal carcinoma cells (green line, Figure 5d and  
347 Supplementary Figure 5c).

348 To corroborate these findings, we repeated fitness assays in the more complex pooled  
349 competition assay. Here, the evolution of defined mixtures of mutant cells is quantified by  
350 amplicon sequencing of sgRNA barcodes. Consistent with previous results, cells carrying  
351 *NEAT1* mutations outcompeted control cells over time (Figure 5e).

352 These results were obtained from monolayer cells, whose relevance to real tumours is  
353 disputed. Thus, we performed additional experiments in 3-dimensional spheroids grown from  
354 mutated HCT116 cells, and observed again that Reg2 mutations led to increased growth  
355 (Figure 5f).

356 The experiments thus far were performed in transformed cancer cells. To investigate  
357 whether *NEAT1* mutations also enhance fitness in a non-transformed background, we  
358 performed similar experiments in MRC5 immortalised foetal lung fibroblasts. Again, *NEAT1*  
359 mutations were observed to increase fitness, in terms of cell growth (Figure 5g) and, at least  
360 for Reg2, in terms of anchorage-independent growth (Figure 5h).



361           We sought independent evidence for the importance of *NEAT1* mutations in real-life  
362 cancer progression. Using patient survival data from the PCAWG cohort, we asked whether  
363 presence of a *NEAT1* mutation correlates with shorter survival. Indeed, in lymphoid cancer  
364 patients, *NEAT1* mutations correlate with significantly worse prognosis (Figure 5i). This effect  
365 remains even after accounting for differences in total mutation rates using the Cox proportional  
366 hazards model (P=0.02).

367           In summary, *NEAT1* tumour mutations consistently increase cell fitness *in vitro*  
368 independent of genetic background, and are associated with poor prognosis in lymphoid  
369 cancer patients.

370

Figure 5

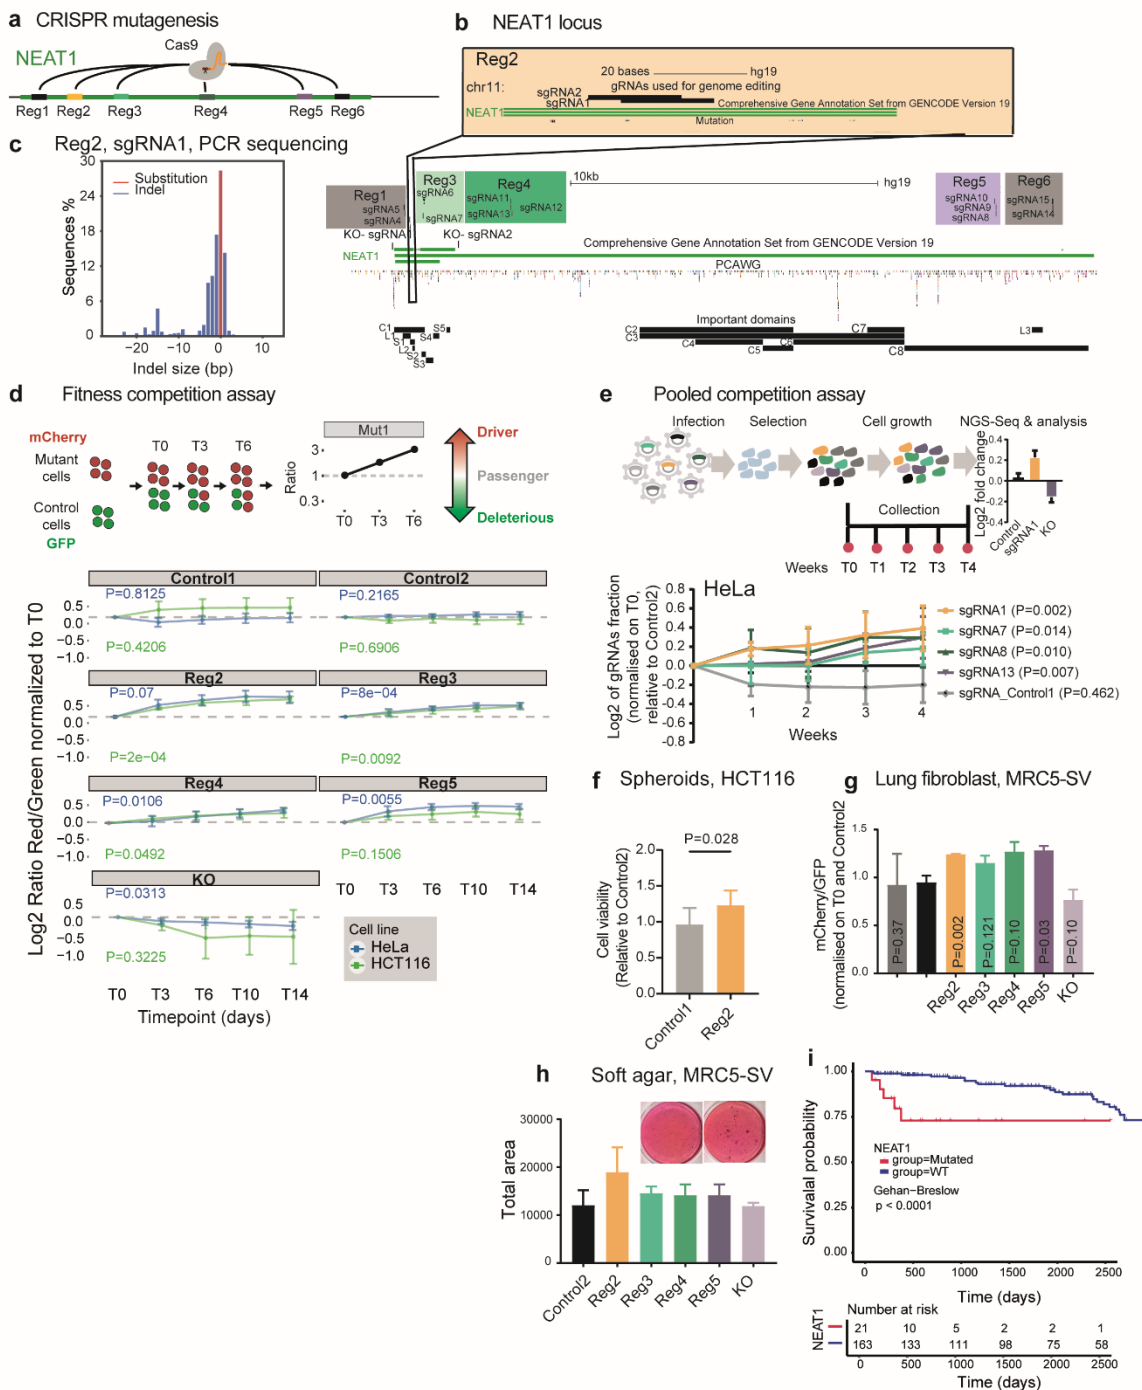

371

372 **Figure 5. Mutations in *NEAT1* promote cell fitness and correlate with survival**

373 **a)** Overview of the experimental strategy to simulate tumour mutations in the *NEAT1* lncRNA gene by  
 374 wild-type Cas9 protein. **b)** A detailed map of the six *NEAT1* target regions and 15 sgRNAs. Paired  
 375 gRNAs used for the deletion of *NEAT1\_1* are indicated as KO- sgRNA1 and KO- sgRNA2. Previously  
 376 described functional regions of *NEAT1* are indicated below, according to the publication of Yamazaki  
 377 and colleagues<sup>46</sup>. **c)** Analysis of mutations created by Cas9 recruitment. The target region was  
 378 amplified by PCR and sequenced. The frequency, size and nature of resulting DNA mutations are  
 379 plotted.

380 **d)** Competition assay to evaluate fitness effects of mutations. Above: Rationale for the assay. Labelled  
381 mutated (mCherry, red) and control (GFP, green) cells are mixed in equal proportions at the start of the  
382 experiment. At successive timepoints their red/green ratio is measured by flow cytometry, and this value  
383 is used to infer fitness effects. Below: Red/green ratios for indicated mutations. “Control1/2” indicate  
384 sgRNAs targeting intergenic regions. “KO” indicates paired sgRNAs designed to delete the entire  
385 NEAT1\_1 region. Separate experiments were performed in HeLa and HCT116 cells. n=4 replicated  
386 experiments were performed, and statistical significance was estimated by linear regression model on  
387 log2 values. **e)** Upper panel: Setup of mini CRISPR fitness screen. HeLa cells are infected with lentivirus  
388 carrying defined mixtures of sgRNAs. The sgRNA sequences are amplified and sequenced at defined  
389 timepoints. Changes in abundance reflect effects on cell fitness. Lower panel: Abundances of displayed  
390 sgRNAs, normalised to the Control 2 negative control. n=4 independent experiments were performed,  
391 and statistical significance was estimated by linear regression model. **f)** HCT116 cells were cultured as  
392 spheroids and their population measured. n=4 replicated experiments were performed, and statistical  
393 significance was estimated using Student’s one-sided *t*-test. **g)** As for Panel D, but with non-transformed  
394 MRC5 lung fibroblast cells at timepoint Day 14. Statistical significance was estimated by one-sided  
395 Student’s *t*-test based on n=3 independent replicates. **h)** MRC5 cells were seeded in soft agar, and the  
396 area of colonies at 3 weeks were calculated. The mean of n=2 replicated experiments are shown. **i)**  
397 The survival time of 184 lymphoid cancer patients from PCAWG is displayed. Patients were stratified  
398 according to whether they have  $\geq 1$  SNVs in the *NEAT1* gene.

399

#### 400 **Mutations alter the NEAT1 protein interactome and increase paraspeckle formation**

401 *NEAT1* is a necessary component of subnuclear paraspeckles 48,54,55, which assemble  
402 when specific architectural proteins bind to nascent NEAT1\_2 transcripts<sup>51</sup>. Paraspeckles are  
403 nuclear condensates containing diverse gene regulatory proteins<sup>43</sup>. They are often observed  
404 in cancer cells,<sup>52</sup> and are associated with poor prognosis<sup>53</sup>. Thus, we hypothesised that  
405 *NEAT1* mutations might affect cell fitness via alterations in paraspeckle number or structure.

406 We first evaluated changes in *NEAT1* expression and isoform usage in response to  
407 mutations. Mutations caused no statistically-significant change in NEAT1\_1 expression, while  
408 deletion of NEAT1\_1 reduced steady-state levels, as expected (Figure 6a). Interestingly, the  
409 only mutation to significantly increase NEAT1\_2 levels was in Region 4 (Figure 6b), which is  
410 consistent with the fact that it contains the alternative polyadenylation site that mediates  
411 switching between the short and long isoforms<sup>54</sup>.

412 Using fluorescence in situ hybridisation (FISH) with NEAT1\_2 probes, we next asked  
413 whether mutations impact on paraspeckle number or structure (Figure 6c). Despite changes  
414 in isoform expression noted above, mutations in Region 4 resulted in no change in the number  
415 or size of paraspeckles, in line with previous findings<sup>46</sup> (Figure 6d,e). However, mutations in  
416 Region 2 yielded a significant increase in number and size of paraspeckles (Figure 6c,e).

417 *NEAT1* is known to function via a diverse cast of protein partners. Region 2 mutations  
418 overlap several known protein binding sites, and fall in or near to areas of deep evolutionary  
419 conservation of sequence and structure (Supplementary Figure 5d).

420 To better understand how Region 2 mutations alter *NEAT1* function, and evaluate if  
421 mutation could affect the binding of proteins to *NEAT1* (Figure 6f), we compared the protein-  
422 interactome of wild-type and mutant RNA by *in vitro* pulldown coupled to mass-spectrometry.  
423 We created a 288 nt fragment of *NEAT1*-Region 2 for wild-type (WT) and mutated sequence,  
424 the latter containing two SNVs observed in patient tumours (Figure 6g). We performed RNA  
425 pull-down with nuclear lysate from HeLa cells, followed by mass spectrometry. Altogether, 154  
426 interacting nuclear proteins were identified for wild-type sequence. Supporting the usefulness  
427 of this approach, interacting proteins highly enriched for both known *NEAT1*-binders and  
428 paraspeckle proteins (see Methods) and include well known examples like NONO<sup>46,55</sup> (Figure  
429 6h). Comparing mutant to WT interactomes, we observed widespread changes in *NEAT1*  
430 complexes: altogether 8 (4.6%) proteins are lost by mutant RNA, and 18 (10.3%) gained  
431 (Figure 6i).

432 We investigated whether mutations create or destroy known binding motifs of changing  
433 proteins, but could find no evidence for this. However, we did note that mutations lead to  
434 increased binding of previously-discovered interactors, U2SURP and PTBP1 (Figure 6i).  
435 Intriguingly, increased binding was also observed for PQBP1 protein, whose disordered  
436 domain has been linked to condensate formation, offering a potential mechanism in facilitating  
437 paraspeckle formation<sup>56</sup>. Conversely, STRING analysis revealed that the proteins lost upon  
438 mutation are highly enriched for members of the core RNA Polymerase II complex  
439 (strength=2.51, P=0.016; basic list enrichment by STRING, Benjamini-Hochberg corrected)  
440 and physically interacting with other proteins of this complex (Figure 6j). In summary, tumour  
441 mutations in *NEAT1* give rise to reconfiguration of the protein interactome, creating several  
442 potential mechanisms by which paraspeckles formation is promoted in transformed cells.

443

Figure 6

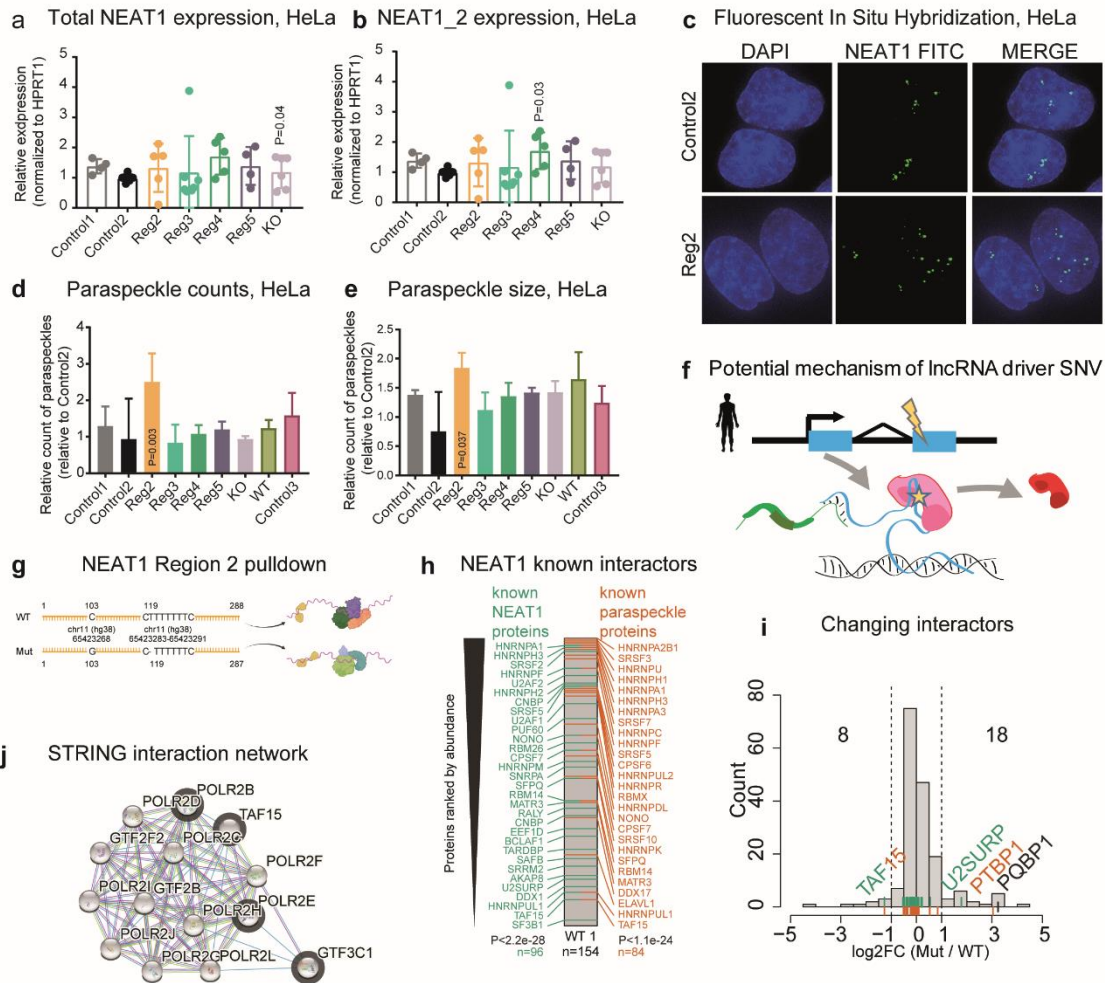

444

445 **Figure 6. Mutations at the 5' end of NEAT1 increase paraspeckle formation and alter the protein**  
 446 **interactome**

447 **a)** Normalised steady state RNA levels of NEAT1, as estimated using primers for the total NEAT1 region.

448 Statistical significance was estimated using Student's one-sided *t*-test. P-values  $\geq 0.05$  are not shown.

449 **b)** As for Panel A, but using primers for NEAT1\_2. **c)** Representative images from fluorescence in situ

450 hybridisation (FISH) visualisation of NEAT1 in HeLa cells expressing sgRNAs for Control 2 and NEAT1

451 Region 2. **d)** Counts of paraspeckles in HeLa cells treated with indicated sgRNAs, normalised and

452 compared to Control 2 cells. Values were obtained from 80-100 cells per replicate. N=5 biological

453 replicates. Statistical significance was estimated using paired *t*-test. **e)** As for Panel D, but displaying

454 paraspeckle size. **f)** Schematic representation of the mechanism of action of driver mutations within

455 NEAT1 sequence. **g)** Sequences of biotinylated probes used for mass-spectrometry analysis of NEAT1-

456 interacting proteins.

457 **h)** Proteins detected by wild-type (WT) *NEAT1* probe, filtered for nuclear proteins only, are ranked by  
458 intensity and labelled when intersecting databases of previously-detected NEAT1-interacting proteins  
459 (green) and paraspeckle proteins (orange). Statistical significance was calculated by hypergeometric  
460 test (to background of all nuclear proteins n=6758). **i)** Histogram shows differential detection of proteins  
461 comparing mutated (Mut) and wild-type (WT) probes. Dotted lines indicate log<sub>2</sub> fold-change cutoffs of -  
462 1 / +1. **j)** STRING interaction network based on a subset of the proteins lost upon mutation (grey borders)  
463 interacting with the RNA polymerase II core complex.  
464

## 465 Discussion

466  
467 Understanding which mutations give rise to pathogenic cell fitness, and how they do so,  
468 are fundamental goals of cancer genomics. Here we have focussed on a particularly intriguing  
469 class of potential driver elements, the lncRNAs, which are known to be both potent cancer  
470 genes and highly mutated in tumours, and yet for which no driver mutation has been  
471 experimentally validated to date <sup>2,29,31,57</sup>.

472 To address this gap, we here developed an improved method, ExInAtoR2, to search for  
473 driver lncRNAs based on integrated signatures of positive selection. In total, this identified 54  
474 candidate driver lncRNAs across the largest tumour cohort tested to date. The value of these  
475 predictions is supported by consistency between independent cohorts, overlap with various  
476 cancer lncRNA databases, and from functional screens in mouse. Nevertheless, *in silico* driver  
477 analyses suffer from a variety of constraints, from false positives due to localised, non-selected  
478 mutational processes, to false negatives due to the limited sample size. Such factors have  
479 limited the confidence with which previous studies <sup>29,30</sup> could interpret the functional relevance  
480 of highly mutated lncRNAs, underlining the importance of experimental results presented here.

481 The usefulness of novel ExInAtoR2 predictions was demonstrated by functional studies  
482 on two lncRNAs, *MIHNC* (Head and Neck cancer) and *MILC* (Hepatocellular Carcinoma). Not  
483 only are both capable of promoting cancer cell growth in their wild-type form, but interestingly,  
484 this activity is enhanced by tumour mutations. These findings provide experimental support for  
485 the usefulness of driver analysis in identifying novel cancer lncRNAs.

486 Among the candidate driver lncRNAs we identified the widely-studied *NEAT1*. Previous  
487 tumour sequencing studies have noted the elevated density of SNVs at this locus, but generally  
488 attributed them to passenger mutational processes, possibly a consequence of unusually high  
489 transcription rate <sup>2,29,31,57</sup>. Here, we have provided experimental evidence, via naturalistic *in*  
490 *cellulo* mutagenesis with CRISPR-Cas9, that *NEAT1* SNVs reproducibly give rise to increased  
491 cell proliferation, in a range of backgrounds including non-transformed cells. The latter raises  
492 the intriguing possibility that *NEAT1* SNVs might contribute to early stages of tumorigenesis.  
493 Other observations are worthy of mention. Firstly, amongst fitness-altering *NEAT1* SNVs, we  
494 only observed those that increase growth, and none that decreased it. Secondly, not all tested  
495 regions of *NEAT1* could host fitness-altering mutations, and these were clustered at  
496 previously-mapped functional elements in mature RNA <sup>44,46</sup>. Altogether, these findings suggest  
497 that tumour SNVs at particular regions of *NEAT1* are phenotypically non-neutral and capable  
498 of increasing cell fitness by altering function of encoded RNA. The notion that the *NEAT1* gene  
499 represents a vulnerability to tumorigenesis is further supported by our demonstration that  
500 patients carrying mutations in the gene have worse prognosis, as well as published transposon  
501 insertional mutagenesis screens in mouse <sup>27</sup>.

502 The relatively well-understood role of *NEAT1* in assembling ribonucleoprotein phase-  
503 separated paraspeckle organelles afforded important insights into SNVs' molecular  
504 mechanisms. Introduction of tumour mutations at the gene's 5' end impacted protein binding,  
505 including a significant loss of interaction with the RNA Polymerase II complex mediated by  
506 known *NEAT1* interactor *TAF15*. Other known protein interactions are potentiated in mutated  
507 RNA, suggesting that changes in paraspeckles may be mediated by both gains and losses of  
508 protein interactions. The fact that these same mutations gave rise to increased numbers and  
509 sizes of paraspeckle structures, suggests a model where SNVs alter the assembly of *NEAT1*  
510 ribonucleoprotein complexes, thereby promoting paraspeckle formation and hence cell growth.

511 Future studies will have to address a number of gaps and questions raised here. Firstly,  
512 the available of larger tumour cohorts will afford statistical power to discover candidate driver  
513 lncRNAs with greater accuracy, while improved statistical models and gene annotations will  
514 reduce false positives and false negatives, respectively. While we have provided functional  
515 experimental evidence for effects on cell phenotype arising from SNVs, it will be important to  
516 replicate this in better models, notably by introducing precise tumour mutations into cellular  
517 genomes (eg by recent Prime Editing method)<sup>58,59</sup>, and testing their effects in faithful tumour  
518 models, such as mice or tumour organoids<sup>60,61</sup>. Finally, key mechanistic questions remain to  
519 be answered, such as the precise protein partners whose interaction is altered to result in  
520 paraspeckle changes.

521 Phenotype-altering lncRNA mutations could have eventual implications for therapy. We  
522 have shown how lncRNA mutations can be prognostic for patient survival, and how driver  
523 analysis leads to potential new targets for antisense oligonucleotide (ASO) therapeutics. In  
524 future, patients carrying identified driver SNVs in tumour-specific lncRNAs might be treated  
525 using personalised cocktails of ASOs, for low-toxicity and effective therapy<sup>62-64</sup>.

526 In summary, this work represents the first experimental evidence that fitness-boosting  
527 somatic tumour mutations can act via changes in lncRNA function. We have sketched a first  
528 mechanistic outline of how this process occurs via altered protein interaction and changes to  
529 membraneless organelles, in this case, paraspeckles. Our catalogue of candidate driver  
530 lncRNAs across thousands of primary and metastatic tumours provides a foundation for future  
531 elucidation of the extent and mechanism of driver lncRNAs.



## 532 **Methods**

533

### 534 **ExInAator2 algorithm**

535 ExInAator2 is composed of two separate modules for detection of positive selection: one  
536 for recurrence (RE), comparing the exonic mutation rate to that of the local background;  
537 another for functional impact (FI), comparing the estimated functional impact of mutations to  
538 background, both estimated in exons.

539 As an improvement to the first version of ExInAator<sup>65</sup>, the RE module compares the  
540 number of observed exonic mutations against a distribution of simulated exonic counts  
541 (Supplementary Figure 1a), obtained by random repositioning of the variants the between the  
542 exonic and background regions while maintaining the same trinucleotide spectrum.  
543 Background region is defined for each gene as introns plus 10 kb up and downstream, after  
544 removing nucleotides overlapping exons from any other gene. Exonic and background regions  
545 can be further filtered to remove any additional “masked” regions defined by the user. In this  
546 manuscript, this functionality was used to mask low mappability regions and gap regions  
547 obtained from the UCSC Genome Browser (Supplementary File1).

548 The use of local background and controlling for trinucleotide content is intended to avoid  
549 known sources of false positives arising from covariates in mutational processes and  
550 mutational signatures, such as replication timing, gene expression, chromatin state, etc<sup>33</sup>.

551 A *p*-value is assigned to each gene, being the fraction of simulations with higher or equal  
552 number of mutations compared to the observed number (Formula 1).

553

$$554 \quad RE_{p\text{-value}} = \frac{\# \text{ of simulated exonic counts } \geq \text{ observed exonic count}}{\text{total \# of simulations}}$$

555

### 556 Formula 1: p-value calculation for the recurrence (RE) module.

557

558 The second FI module compares the mean functional score of the observed exonic  
559 mutations to a distribution of simulated values. Simulations are performed by random  
560 repositioning of mutations in exonic regions, while maintaining identical trinucleotide content  
561 (Supplementary Figure 1b). Similar to the RE model, a *p*-value is obtained by comparing the  
562 number of simulations with an exonic mean functional score higher or equal to the observed  
563 value (Formula 2). This module work with any base-level scoring method. Given its previous  
564 successful use and integrative nature, we selected the Combined Annotation Dependent  
565 Depletion (CADD) scoring system<sup>66</sup>.

566

567 
$$FI_{p\text{-value}} = \frac{\# \text{ of simulated exonic means } \geq \text{ observed exonic mean}}{\text{total \# of simulations}}$$

568

569 Formula 2:  $p$ -value calculation for the Functional Impact (FI) module.

570

571 In a final step, RE and FI  $p$ -values are combined using the Fisher method (Formula 3).

572

573 
$$\text{Combined}_{p\text{-value}} = -2 * [\ln(\text{RE}_{p\text{-value}}) + \ln(\text{FI}_{p\text{-value}})]$$

574

575 Formula 3: Fisher method for  $p$ -value integration.

576

### 577 **Tumour somatic mutations**

578 The principal source of mutations were primary tumours from the Pan-Cancer Analysis  
579 of Whole Genomes (PCAWG) project <sup>1</sup>. This dataset was created according to a uniform and  
580 strict methodology, including collection of samples, DNA sequencing and somatic variant  
581 calling, aggressive filtering to remove potential artefacts and false positive mutations <sup>1</sup>. For  
582 practical reasons, we only considered Single Nucleotide Variants (SNVs) arising from  
583 substitutions, insertions and deletions of length 1 bp (indels) (Figure 1b). After this filtering, the  
584 PCAWG dataset comprises 37 cancer cohorts, 2,583 samples and 45,703,485 SNVs (Figure  
585 1b). Analyses were performed either on individual cohorts, or on the “Pancancer” union of all  
586 cohorts.

587

### 588 **Gene annotation and filtering**

589 We employed a filtered lncRNA gene annotation based upon Gencode annotation.  
590 Beginning with Gencode v19 annotation, we discarded lncRNA genes overlapping protein-  
591 coding genes, or containing at least one transcript predicted to be protein-coding by CPAT <sup>67</sup>,  
592 with default settings of coding potential  $\geq 0.364$ . To the remaining list of 6981 genes, we added  
593 294 genes from Cancer LncRNA Census (CLC) <sup>23</sup>, not annotated in Gencode v19. The  
594 resulting set of 7275 lncRNA genes were used here unless otherwise specified (Figure 1c;  
595 Supplementary File 2).

596

### 597 **ExInAtoR2 benchmarking against other driver discovery methods**

598 We collected driver predictions from 10 methods, in addition to the combined  
599 predictions generated by the PCAWG driver group (PCAWG combined, PCAWGc) that  
600 displayed best overall performance<sup>2</sup>. We only selected PCAWG methods that were run in both  
601 protein-coding and lncRNAs, and for which predictions were available for individual cohorts  
602 (Figure 2a).

603 The original PCAWG publication used carefully filtered annotations for protein-coding  
604 and lncRNA genes<sup>2</sup>. Only coding sequences (CDS) of protein-coding genes were considered,  
605 while lncRNAs were strictly filtered by distance to protein coding genes, transcript biotype,  
606 gene length, evolutionary conservation and RNA expression. For benchmarking, we ran  
607 ExlnAto2 using the same PCAWG annotations.

608

### 609 **Evaluation of $p$ -value distributions**

610 Under the assumption that most genes are not cancer drivers and follow the null  
611 distribution, the collection of  $p$ -values should mimic a uniform distribution with deviation of a  
612 small number of genes at very low  $p$ -values<sup>68</sup>. Quantile-quantile plots (QQ-plot) (Figure 2b  
613 and Supplementary Figure 3a) display the observed and expected  $p$ -values in  $-\log_{10}$  scale. In  
614 order to generate the theoretical distribution for each driver method across all 37 cohorts and  
615 the Pancancer set, we ranked the total list of  $n$  observed  $p$ -values from lowest to highest, then  
616 for each  $i$  observed  $p$ -value we calculated an expected  $p$ -value according to the uniform  
617 distribution (Formula 4).

618

$$619 \quad \text{expected}_i = \frac{i}{n}$$

620

621 Formula 4: Expected  $p$ -value calculation.  $i$  represents the rank of the corresponding observed  
622  $p$ -value in the total distribution of  $n$  observed  $p$ -values, therefore  $i$  values range from 1 to  $n$ .

623

624 For each driver method, only genes with a reported  $p$ -value were included in this analysis,  
625 i.e., NA cases were discarded. By visual inspection of the QQ-plots, a correct observed  
626 distribution of  $p$ -values should follow a line with 0 as intercept and 1 as slope, where extreme  
627 values beyond approximately 2 in the x-axis should deviate above the diagonal line. We used  
628 the Mean Log Fold Change (MLFC) (Formula 5) to numerically estimate such deviation and  
629 evaluate the performance of driver gene predictions<sup>68</sup>. The closer to zero the MLFC, the better  
630 the statistical modelling of passenger genes following the null distribution<sup>68</sup>.

631

$$632 \quad MLFC = \frac{1}{n} * \sum_i^n \left| \frac{\text{observed}_i}{\text{expected}_i} \right|$$

633

634 Formula 5: Mean Log Fold Change (MLFC).  $n$  represents the total number of  $p$ -values and  $i$  the  
635 lowest  $p$ -value.

636

### 637 **Gene benchmark sets**

638 We downloaded known driver genes from the Cancer Gene Census <sup>36</sup> (CGC)  
639 ([www.cancer.sanger.ac.uk/census](http://www.cancer.sanger.ac.uk/census)) on 06/02/2019 as a TSV file. We extracted all Gencode  
640 *ENSG* identifiers, resulting in a list of 703 genes. For lncRNAs we used the second version of  
641 the Cancer LncRNA Census <sup>23</sup>, which contains 513 Gencode lncRNAs.

642

### 643 **Precision, sensitivity and F1 comparison**

644 CGC and CLC genes were used as ground truth for driver predictions of protein-coding  
645 and lncRNAs, respectively. Three metrics were used to compare driver predictions: Precision,  
646 the proportion of predictions that are ground truth genes (Formula 6); Sensitivity, the fraction  
647 of ground truth genes that are correctly predicted (Formula 7); F1-score, the harmonic mean  
648 of precision and sensitivity (Formula 8).

649

$$650 \text{ Precision} = \frac{TP}{TP + FP} * 100$$

651

652 Formula 6: Precision.

653

$$654 \text{ Sensitivity} = \frac{TP}{TP + FN} * 100$$

655

656 Formula 7: Sensitivity.

657

$$658 \text{ F1 - score} = 2 * \frac{\text{Precision} * \text{Sensitivity}}{\text{Precision} + \text{Sensitivity}}$$

659

660 Formula 8: F1-score.

661

### 662 **Simulated mutation datasets**

663 To generate realistic simulated data, each mutation was randomly repositioned to  
664 another position with identical trinucleotide signature (ATA > ATA, being the central nucleotide  
665 the one mutated) within a window of 50 kb on the same chromosome.

666

## 667 **Generation and comparison of genomic features**

668 Evolutionary conservation: We downloaded base-level PhastCons scores for all 46way  
669 and 100way alignments <sup>69</sup> from the UCSC Genome Browser <sup>70</sup>. We calculated the average  
670 value across all exons of each gene.

671 Expression in normal samples: We obtained RNA-seq expression estimates in  
672 transcripts per million (TPM) units for 53 tissues from GTEx  
673 (<https://gtexportal.org/home/datasets>). For tissue specificity, we calculated *tau* values as  
674 previously described <sup>71</sup> ([https://github.com/severinEvo/gene\\_expression/blob/master/tau.R](https://github.com/severinEvo/gene_expression/blob/master/tau.R)).

675 Replication timing: We collected replication time data of 16 different cell lines from the  
676 UCSC browser <sup>70</sup> ([http://genome.ucsc.edu/cgi-  
677 bin/hgFileUi?db=hg19&q=wqEncodeUwRepliSeq](http://genome.ucsc.edu/cgi-bin/hgFileUi?db=hg19&q=wqEncodeUwRepliSeq)).

678 miRNA binding: We downloaded both bioinformatically predicted (miTG scores) and  
679 experimentally validated miRNA binding to lncRNAs from LncBase <sup>72</sup>  
680 ([http://carolina.imis.athena-innovation.gr/diana\\_tools/web/index.php?r=lnccbasev2%2Findex](http://carolina.imis.athena-innovation.gr/diana_tools/web/index.php?r=lnccbasev2%2Findex)).

681 Tumour expression: Expression values in units of FPKM-*uq* were obtained from  
682 PCAWG <sup>1</sup>.

683 Drug-expression association: We extracted expression-drug association *p*-values from  
684 LncMAP <sup>73</sup> (<http://bio-bigdata.hrbmu.edu.cn/LncMAP>).

685 Germline cancer small nucleotide polymorphisms (SNPs): We downloaded SNPs from  
686 the GWAS Catalogue <sup>74</sup> (<https://www.ebi.ac.uk/gwas/>).

687 CIS evidence in mice: We downloaded CIS coordinates from CCGD <sup>75</sup> ([http://ccgd-  
688 starrlab.oit.umn.edu/download.php](http://ccgd-starrlab.oit.umn.edu/download.php)) and mapped them to human hg19 with LiftOver  
689 (<https://genome.ucsc.edu/cgi-bin/hgLiftOver>) from the UCSC browser <sup>70</sup>. Then, we calculated  
690 the number of CIS intersecting each lncRNA divided by the gene length with a custom script  
691 using BEDtools <sup>76</sup>. CIS per Mb values are available in Supplementary File 3.

692

## 693 **Survival analysis**

694 Survival plots were constructed using donor-centric whole genome mutations dataset,  
695 overall survival data and tumour histology data from UCSC Xena Hub:  
696 [https://xenabrowser.net/datapages/?cohort=PCAWG%20\(donor%20centric\)&removeHub=https%3A%2F%2Fxcna.treehouse.gi.ucsc.edu%3A443](https://xenabrowser.net/datapages/?cohort=PCAWG%20(donor%20centric)&removeHub=https%3A%2F%2Fxcna.treehouse.gi.ucsc.edu%3A443). The whole genome mutations file was  
697 intersected with comprehensive gene annotation v37  
698 ([https://www.gencodegenes.org/human/release\\_38lift37.html](https://www.gencodegenes.org/human/release_38lift37.html)) using BEDtools intersect to  
700 isolate donors with mutations in lncRNA of interest. Survival of donors with mutations in  
701 lncRNA of interest was then compared against the group of donors without mutations in  
702 lncRNA of interest using R packages “survival” ([https://cran.r-](https://cran.r-project.org/web/packages/survival/index.html)  
703 [project.org/web/packages/survival/index.html](https://cran.r-project.org/web/packages/survival/index.html)) and “survminer” ([https://cran.r-](https://cran.r-project.org/web/packages/survminer/index.html)  
704 [project.org/web/packages/survminer/index.html](https://cran.r-project.org/web/packages/survminer/index.html))

705

### 706 **NEAT1 structure and element analysis**

707 Elements: The window spanning 300 bp around Mut1a and Mut1b (hg19  
708 chr11:65190589-65190888; hg38 chr11:65423118-65423417) was annotated with the  
709 program ezTracks <sup>77</sup> using the following datasets as input: (i) structural features: RNA  
710 structures conserved in vertebrates (CRS) <sup>78</sup>, DNA:RNA triplex structures <sup>79</sup>, R-Loops lifted  
711 over to hg38 <sup>80</sup>; (ii) conservation: phastCons conserved elements in 7, 20, 30 and 100-way  
712 multiple alignments <sup>69</sup> retrieved from UCSC genome browser <sup>81</sup>; (iii) high confidence narrow  
713 peaks from eCLIP experiments from ENCODE <sup>82</sup> (Complete list of accessions is located at  
714 Supplementary Table 2).

715 RBP motif mapping. The 20 bp-padded sequence around Mut1a and Mut1b (hg19  
716 chr11:65190719-65190775) was extracted and then used to generate the sequence of the  
717 three distinct alleles WT, only Mut1a and only Mut1b. The three sequences were used as input  
718 for de novo RBP motif matching in the web servers RBPmap <sup>83</sup> using the option Genome: other  
719 and all Human/Mouse motifs) and RBPDB <sup>84</sup> (using the default score threshold, 0.8). Outputs  
720 were manually parsed and further processed using an in-house Python script.

721 SNP structural impact analysis. Sequences for the window spanning 300 bp around  
722 each mutation target were extracted. Then, only substitutions were kept and encoded  
723 according to their relative position and submitted to the MutaRNA web server <sup>85</sup>, which also  
724 reports scores from RNAsnp <sup>86</sup>.

725

726

### 727 **Cell culture**

728 HeLa, HEK 293T and HCT116 were a kind gift from Roderic Guigo's lab (CRG,  
729 Barcelona). The MRC5-SV cells were provided by the group of Ronald Dijkmanthe (Institute  
730 of Virology and Immunology, University of Bern) and the HN5 tongue squamous cell carcinoma  
731 cells by Jeffrey E. Myers (MD Anderson) to Y. Zimmer. All the cell lines were authenticated  
732 using Short Tandem Repeat (STR) profiling (Microsynth Cell Line Typing) and tested negative  
733 for mycoplasma contamination.

734 HeLa, HN5 and HEK 293T cell lines were cultured at 37°C in 5% CO<sub>2</sub> in Dulbecco's  
735 Modified Eagle's Medium high-glucose (Sigma) supplemented with: 10% FBS (Gibco), 1% L-  
736 Glutamine (ThermoFisher), 100 I.U./mL of Penicillin/Streptomycin (Thermo Fisher).

737 HCT-116 and MRC5-SV were cultured in McCoy (Sigma) and EMEM (Sigma),  
738 respectively, both supplemented with 10% FBS (Gibco), 1% L-Glutamine (ThermoFisher), 100  
739 I.U./mL of Penicillin/Streptomycin (Thermo Fisher). SNU-475 (ATCC) and HuH7 (Cell Line  
740 Service) hepatocellular carcinoma cell lines were cultured at 37°C in 5% CO<sub>2</sub> in RPMI-1640,  
741 GlutaMAX™ (Gibco) supplemented with 10% FBS (Gibco) and 100 I.U./mL of  
742 Penicillin/Streptomycin (Thermo Fisher).

743

#### 744 **Gene overexpression and knockdown experiments**

745 Both the wild-type and mutated lncRNA spliced sequences were synthesized by Gene  
746 Universal Inc, into pcDNA3.1 vector backbone. Control pcDNA3.1 plasmids contained the  
747 sequence of enhanced green fluorescent protein (EGFP).

748 Overexpression in HN5 cells: For each transfection 1.6 ug of plasmid DNA has been incubated  
749 for 20 minutes with 4 µl of Lipofectamine 2000 transfection reagent (Invitrogen) in 0.2 ml of  
750 OptiMEM media (Gibco) and added to the cells cultured in a 6-well plate. As all plasmids  
751 contain G418 resistance gene, cells were cultured in 2.5 mg/ml of G418 (Gibco) 48h after  
752 transfection.

753 Overexpression in HuH7 cells: For each transfection, 100 ng of plasmid DNA were  
754 incubated for 20 minutes with 0.15 µl Lipofectamine 3000 and 0.2 µl P3000 transfection  
755 reagent (Invitrogen) in 10 µl RPMI-1640, GlutaMAX™ (Gibco) and added on top of 2000 HuH7  
756 cells cultured in a 96-well plate. Transfection efficiency was measured with qPCR after 120h.

757 Knockdown in SNU-475 and HuH7 cells: For the transfections, 10 nM of each ASO were  
758 incubated with 0.15 µl Lipofectamine 3000 (Invitrogen) for 20 min in 10 µl RPMI-1640,  
759 GlutaMAX™ (Gibco) and added on top of 2000 SNU-475 or HuH7 cells cultured in a 96-well  
760 plate. Transfection efficiency was measured with qPCR after 144h.

761 ASO sequences available in Supplementary File 4.

762

#### 763 **Crystal violet staining**

764 Cells were dissociated with 0.05% trypsin-EDTA (Gibco), resuspended in complete  
765 media and counted in Neubauer chamber. Subsequently, 1000 cells per well were plated in a  
766 6-well plate, cultured for one week and stained in a 2% Crystal violet (Sigma) solution. The  
767 area percentage covered with cells was analysed using ImageJ (%Area). Data analysis was  
768 conducted in Graphpad Prism version 8.0.1. One-way ANOVA was used to determine  
769 statistical significance,  $\alpha=0.05$ .

770

#### 771 **Proliferation assay – SNU-475 and HuH7**

772 After transfection, the proliferative capacity of SNU-475 and HuH7 was measured every  
773 24h by resazurin assay. Briefly, Resazurin sodium salt (Sigma) was added to each well to  
774 reach a final concentration of 3  $\mu$ M and was incubated at 37°C for 2h. Absorbance was  
775 measured with Tecan Spark Plate Reader at 545 nm and 590 nm.

776

#### 777 **CRISPR sgRNA design and cloning**

778 CRISPR activation in HeLa cells was performed as described by Sanson and  
779 colleagues<sup>87</sup>. sgRNAs were designed using the GPP sgRNA Designer CRISPRa from the  
780 Broad Institute (<https://portals.broadinstitute.org/gpp/public/>) (Supplementary File 4). For each  
781 sgRNA, forward and reverse DNA oligos were synthesized introducing the BsmB1 overhangs.  
782 The two oligos were phosphorylated with the Anza™ T4 PNK Kit (Thermofisher) according to  
783 the manufacturer instructions in a 10  $\mu$ l final volume. The phosphorylation/annealing reaction  
784 was set up in a thermocycler at 20° C for 15 min, followed by 95°C for 5 min and then ramp  
785 down to 25° C at 5° C/min rate. For ligation of annealed oligos into the pXPR\_502 backbone  
786 (Addgene #96923), the plasmid was first digested and dephosphorylated with FastDigest  
787 BsmBI and FastAP (Thermofisher) at 37°C for 2 hrs. Ligation reaction was carried out with the  
788 Rapid DNA Ligation Kit (Thermo) according to the manufacturer instructions.

789 sgRNAs targeting *NEAT1* were designed using the GPP sgRNA Designer CRISPRKo  
790 from the Broad Institute (<https://portals.broadinstitute.org/gpp/public/>) (Supplementary File 4),  
791 and cloned into the pDECKO backbone (Addgene #78534) as described above.

792

#### 793 **Lentivirus production**



794 For lentivirus production, HEK293T cells ( $2.5 \times 10^6$ ) were seeded in poly-L-lysine  
795 coated 100 mm culture dishes 24 hrs prior to transfection. Cells were then co-transfected in  
796 serum-free medium with 12.5  $\mu\text{g}$  of the plasmid of interest (Lenti dCAS-VP64\_Blast plasmid  
797 or sgRNA-containing pXPR\_502 or pDECKO), 4  $\mu\text{g}$  of the envelope-encoding plasmid pVSVg  
798 (Addgene 12260) and 7.5  $\mu\text{g}$  of the packaging plasmid psPAX2 (Addgene 8454) with  
799 Lipofectamine 2000 (ThermoFisher) according to the manufacturer instructions. After 4-6 hrs  
800 the medium was replaced with complete DMEM. Virus-containing supernatant was collected  
801 after 24, 48 and 72 hours post-transfection. The three harvests were pooled and centrifuged  
802 at 3000 rpm for 15 min to remove cells and debris. The supernatant was collected, and for  
803 every four volumes, one volume of cold PEG-it Virus Precipitation Solution was added. The  
804 mix was refrigerated overnight at 4°C and centrifuged at 1500  $\times$  g for 30 min at 4°C. The  
805 supernatant was discarded, and the sample centrifuged at 1500  $\times$  g for 5 min. The lentiviral  
806 pellet was suspended in cold, sterile PBS, aliquoted into cryogenic vials and stored at -70°C.

807

#### 808 **Lentivirus transduction**

809 CRISPRKo: For the generation and transduction of Cas9-expressing cell lines, HeLa,  
810 HCT116 and MRC5-SV Cas9 were incubated for 24 hrs with culture medium containing  
811 concentrated viral preparation carrying pLentiCas9-T2A-BFP and 8  $\mu\text{g}/\text{ml}$  Polybrene. 24 hrs  
812 post-infection, antibiotic selection was induced by supplementing the culturing medium with 4  
813  $\mu\text{g}/\text{ml}$  blasticidin (Thermofisher) for 5 days. Blasticidin selected cells were subjected to 3  
814 rounds of fluorescence-activated cell sorting (FACS) to isolate high BFP-expressing cells.

815 CRISPRa: For the generation and transduction of dCas9-expressing cell lines, HeLa  
816 cells were incubated for 24 hrs with culture medium containing concentrated viral preparation  
817 carrying pLenti dCas9-T2A-BFP-VP64 and 8  $\mu\text{g}/\text{ml}$  Polybrene. Cells underwent FACS sorting  
818 to enrich for high BFP expressing cells.

819 sgRNAs: pLentiCas9-T2A-BFP or dCas9-T2A-BFP-VP64 stable cell line were seeded  
820 into 6 well plates at  $10^6$  cells per well and supplemented with sgRNAs pDECKO or pXPR\_502  
821 lentiviral preps, respectively, and spinfected in the presence of polybrene (2  $\mu\text{g}/\text{ml}$ ) for 95 min  
822 at 2000 rpm at 37 °C, followed by medium replacement. 24 hrs post-infection, antibiotic  
823 selection was induced by supplementing the culturing medium with 2  $\mu\text{g}/\text{ml}$  puromycin  
824 (Thermofisher) for at least 3 days.

825

#### 826 **RT-qPCR gene expression analysis**

827 HeLa cells were lysed, and total RNA was extracted by using the Quick-RNA™  
828 Miniprep Kit (Zymo Research). For each sample, RNA was retro-transcribed into cDNA by  
829 using the GoScript™ Reverse Transcription System (Promega) and the expression of the  
830 target gene was assessed through Real-Time PCR with the GoTaq® qPCR Master Mix. To  
831 this purpose target-specific mostly intron-spanning primers (Supplementary File 4) were  
832 designed by using the online tool Primer 3 version 4.1.0.

833

#### 834 **Cell viability assay**

835 After puromycin selection, cells expressing controls and candidates' guides were  
836 collected and seeded in 96-well plates in at least 3 technical replicates for each time point  
837 (3000 cells per well). Proliferation assay was performed using the Cell-Titer Glo 2.0 (Promega)  
838 reagent according to the manufacturer instructions. Luminescence was measured with the  
839 INFINITE 200 PRO series TECAN reader instrument. Time point 0 (T0) reading was performed  
840 4-5 hours after cell seeding.

841

#### 842 **1:1 competition assay**

843 HeLa, HCT116 and MRC5-SV cells were infected with pDECKO lentiviruses  
844 expressing fluorescent proteins. Control plasmids containing sgRNAs targeting *AAVS1*  
845 expressed GFP protein (pgRNAs-AASV1-GFP+), while the sgRNAs targeting the different  
846 regions of *NEAT1* expressed mCherry. After infection, and seven days of puromycin (2 µg/ml)  
847 selection, GFP and mCherry cells were mixed 1:1 in a six-well plate (150,000 cells). Cell counts  
848 were analysed by LSR II SORP instrument (BD Biosciences) and analysed by FlowCore  
849 software.

850

#### 851 **Pooled competition assay**

852 Screen: HeLa cells stably expressing sgRNAs targeting *NEAT1* Reg2, Reg3, Reg4,  
853 Reg5 and KO, and HeLa cells stably expressing sgRNAs Control1 and Control2 were counted  
854 and mixed in the following ratio 10:10:10:10:25:25. At Day 0, 2M cells were collected, while  
855 2M were plated and passaged every 2-3 days. Cells were harvested at 7, 14, 21 and 28 days  
856 for gDNA extraction. The experiment was conducted in six biological replicates.

857            Genomic DNA preparation and sequencing: Genomic DNA (gDNA) was isolated using  
858 the Blood & Cell Culture DNA Mini (<5e6 cells) Kits (Qiagen, cat. no. 13323) as per the  
859 manufacturer's instructions. The gDNA concentrations were quantified by Nanodrop. For PCR  
860 amplification, 1 µg of gDNA was amplified in a 200 µl reaction using Q5® High-Fidelity 2X  
861 Master Mix (NEB #M0491). PCR master mix (100 µl Q5, and 10 µl of Forward universal primer,  
862 and 10 µl of a uniquely barcoded P7 primer (both stock at 10 µM concentration). PCR cycling  
863 conditions: an initial 30 sec at 98 °C; followed by 10 sec at 98 °C, 30 sec at 68 °C, 20 sec at  
864 72 °C, for 22 cycles; and a final 2 min extension at 72 °C. NGS primers are listed in  
865 Supplementary File 4. PCR products were purified with Agencourt AMPure XP SPRI beads  
866 according to manufacturer's instructions (Beckman Coulter, cat. no. A63880). Purified PCR  
867 products were quantified using the Qubit™ dsDNA HS Assay Kit (ThermoFisher, cat. no.  
868 Q32854). Samples were sequenced on a HiSeq2000 (Illumina) with paired-end 150 bp reads.  
869 The raw sequencing reads from individual samples were analysed by using a custom shell  
870 script to count the number of reads containing each sgRNA. The sgRNA counts were then  
871 normalized over the T0 and Control2.

872

### 873 **Deep sequencing to determine indel spectrum**

874            Genomic DNA was extracted using the Blood & Cell Culture DNA Mini (<5M cells) Kits  
875 (Qiagen, cat. no. 13323) as per the manufacturer's instructions. To prepare samples for  
876 Illumina sequencing, a two-step PCR was performed to amplify the different regions of *NEAT1*.  
877 For each sample, we performed two separate 100 ul reactions (25 cycles each) with 250 ng of  
878 input gDNA using Q5 MASTER MIX (NEB #M0491) and the resulting products were pooled  
879 (PCR reaction: 30 sec at 98 °C; followed by 10 sec at 98 °C, 30 sec at 68 °C, 20 sec at 72 °C,  
880 for 22 cycles; and a final 2 min extension at 72 °C). PCR amplicons were purified using solid  
881 phase reversible immobilization (SPRI) beads, run on a 1.5% agarose gel to verify size and  
882 purity, and quantified by Qubit Fluorometric Quantitation (Thermo Fisher Scientific). The  
883 resulting DNA was used for reamplification with primers containing Illumina adaptors using the  
884 Q5 master Mix. Illumina adaptors and index sequences were added to 100 ng of purified PCR  
885 amplicon (PCR reaction: 30 sec at 98 °C; followed by 10 sec at 98 °C, 30 sec at 68 °C, 20 sec  
886 at 72 °C, for 8 cycles; and a final 2 min extension at 72 °C).

887

### 888 **RNA-FISH and immunofluorescence**

889 HeLa cells grown on coverslips were fixed using 4% paraformaldehyde and  
890 permeabilised by 70% ethanol overnight. For RNA-FISH, Stellaris® FISH Probes, targeting  
891 Human *NEAT1* Middle Segment, labelled with FAM dye (1:100, Biosearch Technologies) were  
892 used and the procedure was carried out according to the manufacturer's instructions. Cells  
893 nuclei were counterstained with 1:15,000 DAPI (4',6-diamidino-2-phenylindole) at room  
894 temperature and then mounted onto slides by using the VectaShield (Vector Laboratories)  
895 mounting media. Fluorescence signals were imaged at 100x (UPLS Apo 100x/1.40) using the  
896 DeltaVision Elite Imaging System and Softworx software (GE Healthcare). Images were  
897 acquired as Z-stacks, subjected to deconvolution, and projected with maximum intensity.  
898 Images were processed using a custom CellProfiler pipeline to determine paraspeckle number  
899 and size.

900

### 901 **Soft agar assay**

902 The soft agar colony formation assay was performed as previously described (Borowicz  
903 S., et al., 2014). Briefly, the assay was carried out in 6-well plates coated with a bottom layer  
904 of 1% noble agar in 2X DMEM (ThermoFisher) supplemented with: sodium bicarbonate, 10%  
905 FBS (Gibco), 1% L-Glutamine (ThermoFisher), 100 I.U./ml of Penicillin/Streptomycin  
906 (ThermoFisher). Then, 7000 cells were suspended in 2X DMEM and 0.6% noble agar. The  
907 suspension mixture was subsequently applied as the top agarose layer. A layer of growth  
908 medium was added over the upper layer of agar to prevent desiccation. The plates were  
909 incubated at 37 °C in 5% CO<sub>2</sub> for 3 weeks until colonies formed. After 20 days the colonies  
910 were stained with 200 ml of MTT [(3-(4,5-dimethylthiazol-2-yl)-2,5-diphenyltetrazolium  
911 bromide), (5 mg/ml), Sigma] and incubated for 3 hours at 37 °C. Numbers of colonies were  
912 counted using the analysis software ImageJ.

913

### 914 **3D spheroid assay**

915 HCT116 stably expressing Cas9-BFP and sgRNA-mCherry targeting *NEAT1* locus were  
916 FACS sorted to enrich the population BFP+/mCherry+. The cells were allowed to grow for 7  
917 days, then detached, counted and seeded onto Corning® 96-well Flat Clear Bottom White  
918 (Corning, cat. no. 3610) in 20 µl domes of Matrigel® Matrix GFR, LDEV-free (Corning, cat. no.  
919 356231) and McCoy (Sigma, cat. No. M9309) growth medium (1:1) with a density of 10,000  
920 cells per dome in four technical replicates. Matrigel containing the cells was allowed to solidify  
921 for an hour in the incubator at 37 °C before adding 80ul of McCoy growth media on top of the  
922 wells. The spheroids were allowed to grow in the incubator at 37°C in a humid atmosphere  
923 with 5% CO<sub>2</sub>. After 4 h the number of viable cells in the 3D cell culture was recorded as time  
924 point 0 (T<sub>0</sub>), CellTiter-Glo® 3D Cell Viability Assay (Promega, cat. no. G9682) was added to  
925 the wells, following the manufacturer's instructions for the reading with the Tecan Infinite® 200  
926 Pro. After one week the measurement was repeated.

927

### 928 **RNA pull-down and Mass Spectrometry**

929 RNA pull-down analysis was performed as previously described (Marín-Béjar O, Huarte  
930 M., 2015). Briefly, wild-type and mutant *NEAT1* RNA fragments were transcribed in vitro using  
931 HiScribe™ T7 High Yield RNA Synthesis Kit (NEB, #E2040S) and labelled with Biotin using  
932 Biotin RNA Labelling Mix (Roche, #11685597910) according to the manufacturers'  
933 instructions. Biotinylated RNA (10 pmol) was denatured for 10 min at 65 °C in RNA Structure  
934 Buffer (10 mM tris-HCl, 10 mM MgCl<sub>2</sub>, and 100 mM NH<sub>4</sub>C1) and slowly cool down to 4 °C.  
935 Nuclear fractions were collected as described previously (Carlevaro-Fita J., et al., 2018) and  
936 precleared for 30 min at 4 °C using Streptavidin Mag Sepharose® (Sigma, #GE28-9857-99)  
937 and NT2 Buffer [50 mM tris-HCl (pH 7.4), 150 mM NaCl, 1 mM MgCl<sub>2</sub>, 0.05% NP-40, 1 mM  
938 DTT, 20 mM EDTA, 400 mM vanadyl-ribonucleoside, RNase inhibitor (0.1 U/µl; Promega), and  
939 1x protease inhibitor cocktail (Sigma)]. The precleared nuclear lysates (2 mg) were incubated  
940 with purified biotinylated RNA in NT2 buffer along with Yeast tRNA (20 µg/ml; Thermo Fisher  
941 Scientific #AM7119) with gentle rotation for 1.5 hours at 4°C. Washed Streptavidin Magnetic  
942 Beads were added to each binding reaction and further incubated at 4 °C for 1 h to precipitate  
943 the RNA-protein complexes. Beads were washed briefly five times with NT2 Buffer, and the  
944 retrieved proteins were then subjected to mass spectrometry analysis, performed by the  
945 Proteomics & Mass Spectrometry Core Facility (PMSCF) of the University of Bern, Switzerland,  
946 using MaxQuant software for protein identification and quantification.

947

### 948 **Mass Spectrometry Data Processing**

949 Intensity Based Absolute Quantification (iBAQ) and label-free quantitation (LFQ)  
950 intensities from the MaxQuant output were used for quantitative within-sample comparisons  
951 and fold-enrichment between-sample comparisons respectively. A protein was considered

952 enriched / depleted in a sample condition if its intensity was at least 2-fold greater / lesser than  
953 in the reference condition (proteins not detected in one of the conditions are imputed with the  
954 lowest value for that sample by MaxQuant). Additionally, the resulting lists of proteins were  
955 filtered for nuclear localization <sup>88</sup> to exclude potential false positives. To calculate the  
956 significance of the overlap with known *NEAT1* binding proteins <sup>89-91</sup> and known paraspeckle  
957 proteins <sup>43</sup> a hypergeometric test was applied to the background of all nuclear proteins  
958 (n=6758). STRING was used for interaction analysis (physical subnetwork, minimum  
959 interaction score=0.4, max number of direct interactors=10) and GO term enrichment analysis  
960 <sup>92</sup>. Visualization of the results was done with R version 4.1.1 and BioRender.com.

961

#### 962 **Code availability**

963 The code is accessible at: <https://github.com/gold-lab/ExInAtor2.git>

964

965 **Acknowledgements**

966

967 The results shown here are based upon data generated by the TCGA, PCAWG and GTEx  
968 consortia. We thank Iñigo Martincorena (Sanger Institute) for generously providing certain data  
969 analysis scripts. We thank Federico Abascal (Sanger Institute) for generously providing cancer  
970 cell fraction data. We thank Adrian Ochsenbein, Carsten Riether, Simon Haefliger, Thomas  
971 Marti, Renwang Peng, (Inselspital University Hospital of Bern) for many insightful  
972 conversations. We thank Basak Ginsbourger (DBMR) for administrative support, and Willy  
973 Hofstetter and Patrick Furer (DBMR) for logistical support. All computation was performed on  
974 the Bern Interfaculty Bioinformatics Unit computing cluster maintained by Rémy Bruggmann  
975 and Pierre Berthier. This publication and the underlying study have been made possible partly  
976 on the basis of the data that Hartwig Medical Foundation has made available. Work in the  
977 Johnson laboratory is funded by the Medical Faculty of the University of Bern, the University  
978 Hospital of Bern, the Helmut Horten Stiftung, Swiss Cancer Research Foundation (4534-08-  
979 2018), Science Foundation Ireland through Future Research Leaders award 18/FRL/6194, and  
980 the Swiss National Science Foundation through the National Centre of Competence in  
981 Research (NCCR) “RNA & Disease”.

982

983

984 **Competing interests**

985

986 The authors have no competing interests.

987

988 **References**

- 989 1. Campbell, P. J. *et al.* Pan-cancer analysis of whole genomes. *Nature* **578**, 82–93 (2020).  
990 2. Rheinbay, E. *et al.* Analyses of non-coding somatic drivers in 2,658 cancer whole  
991 genomes. *Nature* **578**, 102–111 (2020).  
992 3. Vogelstein, B. *et al.* Cancer genome landscapes. *Science (1979)* **340**, 1546–1558  
993 (2013).  
994 4. Rubio-Perez, C. *et al.* In Silico Prescription of Anticancer Drugs to Cohorts of 28 Tumor  
995 Types Reveals Targeting Opportunities. *Cancer Cell* **27**, 382–396 (2015).  
996 5. Khurana, E. *et al.* Role of non-coding sequence variants in cancer. *Nature Reviews*  
997 *Genetics* vol. 17 93–108 (Nature Publishing Group, 2016).  
998 6. Gloss, B. S. & Dinger, M. E. Realizing the significance of noncoding functionality in  
999 clinical genomics. *Experimental & Molecular Medicine* **50**, 1–8 (2018).  
1000 7. Elliott, K. & Larsson, E. Non-coding driver mutations in human cancer. *Nat Rev Cancer*  
1001 **21**, 500–509 (2021).  
1002 8. Puente, X. *et al.* Non-coding recurrent mutations in chronic lymphocytic leukaemia.  
1003 *Nature* **526**, 519–524 (2015).  
1004 9. Kim, K. *et al.* Chromatin structure-based prediction of recurrent noncoding mutations in  
1005 cancer. *Nat Genet* **48**, 1321–1326 (2016).  
1006 10. Corona, R. I. *et al.* Non-coding somatic mutations converge on the PAX8 pathway in  
1007 ovarian cancer. **11**, (2020).  
1008 11. Umer, H., Smolinska, K., Komorowski, J. & Wadelius, C. Functional annotation of  
1009 noncoding mutations in cancer. *Life Sci Alliance* **4**, (2021).  
1010 12. Hornshøj, H. *et al.* Pan-cancer screen for mutations in non-coding elements with  
1011 conservation and cancer specificity reveals correlations with expression and survival.  
1012 *NPJ Genom Med* **3**, (2018).  
1013 13. Melton, C., Reuter, J. A., Spacek, D. V & Snyder, M. Recurrent somatic mutations in  
1014 regulatory regions of human cancer genomes. *Nature Publishing Group* **47**, (2015).  
1015 14. Zhu, H. *et al.* Candidate Cancer Driver Mutations in Distal Regulatory Elements and  
1016 Long-Range Chromatin Interaction Networks. **77**, 1307-1321.e10 (2020).  
1017 15. Cho, S. W. *et al.* Promoter of lncRNA Gene PVT1 Is a Tumor-Suppressor DNA  
1018 Boundary Element. *Cell* **173**, 1398-1412.e22 (2018).  
1019 16. Zhou, S. *et al.* Noncoding mutations target cis-regulatory elements of the FOXA1 plexus  
1020 in prostate cancer. *Nat Commun* **11**, (2020).  
1021 17. Li, K. *et al.* Noncoding Variants Connect Enhancer Dysregulation with Nuclear Receptor  
1022 Signaling in Hematopoietic Malignancies. *Cancer Discov* **10**, 724–745 (2020).  
1023 18. Shuai, S. *et al.* The U1 spliceosomal RNA is recurrently mutated in multiple cancers.  
1024 *Nature* **574**, 712–716 (2019).  
1025 19. Statello, L. *et al.* Gene regulation by long non-coding RNAs and its biological functions.  
1026 vol. 22 96–118 (2021).  
1027 20. Gandhi, M., Caudron-Herger, M. & Diederichs, S. RNA motifs and combinatorial  
1028 prediction of interactions, stability and localization of noncoding RNAs. *Nat Struct Mol*  
1029 *Biol* **25**, 1070–1076 (2018).  
1030 21. Guttman, M. & Rinn, J. L. *Modular regulatory principles of large non-coding RNAs.*  
1031 *Nature* vol. 482 339–346 (2012).  
1032 22. Uszczynska-Ratajczak, B., Lagarde, J., Frankish, A., Guigó, R. & Johnson, R. Towards  
1033 a complete map of the human long non-coding RNA transcriptome. *Nature Reviews*  
1034 *Genetics* **19**, 535–548 (2018).



- 1035 23. Vancura, A. *et al.* Cancer LncRNA Census 2 (CLC2): an enhanced resource reveals  
1036 clinical features of cancer lncRNAs. *NAR Cancer* **3**, (2021).
- 1037 24. Leucci, E. *et al.* Melanoma addiction to the long non-coding RNA SAMMSON. *Nature*  
1038 **531**, 518–522 (2016).
- 1039 25. Hu, X. *et al.* A functional genomic approach identifies FAL1 as an oncogenic long  
1040 noncoding RNA that associates with BMI1 and represses p21 expression in cancer.  
1041 *Cancer Cell* **26**, 344–357 (2014).
- 1042 26. Akrami, R. *et al.* Comprehensive Analysis of Long Non-Coding RNAs in Ovarian Cancer  
1043 Reveals Global Patterns and Targeted DNA Amplification. *PLOS ONE* **8**, e80306  
1044 (2013).
- 1045 27. Carlevaro-Fita, J. *et al.* Cancer LncRNA Census reveals evidence for deep functional  
1046 conservation of long noncoding RNAs in tumorigenesis. *Commun Biol* **3**, (2020).
- 1047 28. Redis, R. S. *et al.* Allele-Specific Reprogramming of Cancer Metabolism by the Long  
1048 Non-coding RNA CCAT2. (2016) doi:10.1016/j.molcel.2016.01.015.
- 1049 29. Lanzós, A. *et al.* Discovery of Cancer Driver Long Noncoding RNAs across 1112  
1050 Tumour Genomes: New Candidates and Distinguishing Features. *Scientific Reports* **7**,  
1051 41544. (2017).
- 1052 30. Mularoni, L., Sabarinathan, R., Deu-Pons, J., Gonzalez-Perez, A. & López-Bigas, N.  
1053 OncodriveFML: A general framework to identify coding and non-coding regions with  
1054 cancer driver mutations. *Genome Biology* **17**, 128 (2016).
- 1055 31. Fujimoto, A. *et al.* Whole-genome mutational landscape and characterization of  
1056 noncoding and structural mutations in liver cancer. *Nature Genetics* **48**, 500–509 (2016).
- 1057 32. Rheinbay, E. *et al.* Discovery and characterization of coding and non-coding driver  
1058 mutations in more than 2,500 whole cancer genomes. *bioRxiv* 237313 (2017)  
1059 doi:10.1101/237313.
- 1060 33. Lawrence, M. S. *et al.* Mutational heterogeneity in cancer and the search for new cancer-  
1061 associated genes. *Nature* **499**, 214–218 (2013).
- 1062 34. Rentzsch, P., Schubach, M., Shendure, J. & Kircher, M. CADD-Splice-improving  
1063 genome-wide variant effect prediction using deep learning-derived splice scores.  
1064 *Genome Med* **13**, (2021).
- 1065 35. Frankish, A. *et al.* GENCODE reference annotation for the human and mouse genomes.  
1066 *Nucleic Acids Research* **47**, D766–D773 (2019).
- 1067 36. Sondka, Z. *et al.* The COSMIC Cancer Gene Census: describing genetic dysfunction  
1068 across all human cancers. *Nat Rev Cancer* **18**, 696 (2018).
- 1069 37. Stamatoyannopoulos, J. A. *et al.* Human mutation rate associated with DNA replication  
1070 timing. *Nature Genetics* **2009 41:4** **41**, 393–395 (2009).
- 1071 38. Priestley, P. *et al.* Pan-cancer whole-genome analyses of metastatic solid tumours.  
1072 *Nature* **575**, 210–216 (2019).
- 1073 39. Z, C. *et al.* Prader-Willi region non-protein coding RNA 1 suppressed gastric cancer  
1074 growth as a competing endogenous RNA of miR-425-5p. *Clin Sci (Lond)* **132**, 1003–  
1075 1019 (2018).
- 1076 40. Wedge, D. C. *et al.* Sequencing of prostate cancers identifies new cancer genes, routes  
1077 of progression and drug targets. *Nature Genetics* **2018 50:5** **50**, 682–692 (2018).
- 1078 41. Sasaki, Y. T. F., Ideue, T., Sano, M., Mituyama, T. & Hirose, T. MEN / noncoding RNAs  
1079 are essential for structural integrity of nuclear paraspeckles. *Proceedings of the National*  
1080 *Academy of Sciences* **106**, 2525–2530 (2009).

- 1081 42. Nakagawa, S., Naganuma, T., Shioi, G. & Hirose, T. Paraspeckles are subpopulation-  
1082 specific nuclear bodies that are not essential in mice. *Journal of Cell Biology* **193**, 31–  
1083 39 (2011).
- 1084 43. McCluggage, F. & Fox, A. Paraspeckle nuclear condensates: Global sensors of cell  
1085 stress? *Bioessays* **43**, (2021).
- 1086 44. Adriaens, C. *et al.* The long noncoding RNA NEAT1\_1 is seemingly dispensable for  
1087 normal tissue homeostasis and cancer cell growth. *Rna* **25**, 1681–1695 (2019).
- 1088 45. Liu, E. M. *et al.* Identification of Cancer Drivers at CTCF Insulators in 1,962 Whole  
1089 Genomes. (2019) doi:10.1016/j.cels.2019.04.001.
- 1090 46. Yamazaki, T. *et al.* Functional Domains of NEAT1 Architectural lncRNA Induce  
1091 Paraspeckle Assembly through Phase Separation. *Mol Cell* **70**, 1038-1053 e7 (2018).
- 1092 47. Aguirre, A. J. *et al.* Genomic Copy Number Dictates a Gene-Independent Cell Response  
1093 to CRISPR/Cas9 Targeting. *Cancer Discovery* **6**, 914–929 (2016).
- 1094 48. Haapaniemi, E., Botla, S., Persson, J., Schmierer, B. & Taipale, J. CRISPR-Cas9  
1095 genome editing induces a p53-mediated DNA damage response. *Nat Med* **24**, 927–930  
1096 (2018).
- 1097 49. AH, F. *et al.* Paraspeckles: a novel nuclear domain. *Curr Biol* **12**, 13–25 (2002).
- 1098 50. Hutchinson, J. N. *et al.* A screen for nuclear transcripts identifies two linked noncoding  
1099 RNAs associated with SC35 splicing domains. *BMC Genomics* **8**, 39 (2007).
- 1100 51. Mao, Y. S., Sunwoo, H., Zhang, B. & Spector, D. L. Direct visualization of the co-  
1101 transcriptional assembly of a nuclear body by noncoding RNAs. *Nature Cell Biology* **13**,  
1102 95–101 (2011).
- 1103 52. Adriaens, C. *et al.* P53 induces formation of NEAT1 lncRNA-containing paraspeckles  
1104 that modulate replication stress response and chemosensitivity. *Nature Medicine* **22**,  
1105 861–868 (2016).
- 1106 53. Li, X. *et al.* Oncogenic Properties of NEAT1 in Prostate Cancer Cells Depend on the  
1107 CDC5L–AGRN Transcriptional Regulation Circuit. *Cancer Research* **78**, 4138–4149  
1108 (2018).
- 1109 54. Naveed, A. *et al.* NEAT1 polyA-modulating antisense oligonucleotides reveal opposing  
1110 functions for both long non-coding RNA isoforms in neuroblastoma. *Cell Mol Life Sci* **78**,  
1111 2213–2230 (2021).
- 1112 55. Simko, E. A. J. *et al.* G-quadruplexes offer a conserved structural motif for NONO  
1113 recruitment to NEAT1 architectural lncRNA. *Nucleic Acids Research* **48**, 7421–7438  
1114 (2020).
- 1115 56. Kunde, S. A. *et al.* The X-chromosome-linked intellectual disability protein PQBP1 is a  
1116 component of neuronal RNA granules and regulates the appearance of stress granules.  
1117 *Human Molecular Genetics* **20**, 4916–4931 (2011).
- 1118 57. Nik-Zainal, S. *et al.* Landscape of somatic mutations in 560 breast cancer whole-  
1119 genome sequences. *Nature* **534**, 47–54 (2016).
- 1120 58. Anzalone, A. v., Koblan, L. W. & Liu, D. R. Genome editing with CRISPR–Cas  
1121 nucleases, base editors, transposases and prime editors. *Nature Biotechnology* **2020**  
1122 **38**:7 **38**, 824–844 (2020).
- 1123 59. Anzalone, A. v. *et al.* Search-and-replace genome editing without double-strand breaks  
1124 or donor DNA. *Nature* **576**, 149–157 (2019).
- 1125 60. Artegiani, B. *et al.* Fast and efficient generation of knock-in human organoids using  
1126 homology-independent CRISPR–Cas9 precision genome editing. *Nature Cell Biology*  
1127 **2020 22**:3 **22**, 321–331 (2020).

- 1128 61. Miura, H., Quadros, R. M., Gurumurthy, C. B. & Ohtsuka, M. Easi-CRISPR for creating  
1129 knock-in and conditional knockout mouse models using long ssDNA donors. *Nature*  
1130 *Protocols* 2017 13:1 **13**, 195–215 (2017).
- 1131 62. Wang, F., Zuroske, T. & Watts, J. K. *RNA therapeutics on the rise*. vol. 19 441–442  
1132 (2020).
- 1133 63. Agrawal, S. RNA Therapeutics Are Stepping Out of the Maze. *Trends in Molecular*  
1134 *Medicine* vol. 26 1061–1064 (2020).
- 1135 64. MacLeod, A. R. & Crooke, S. T. RNA Therapeutics in Oncology: Advances, Challenges,  
1136 and Future Directions. *Journal of Clinical Pharmacology* **57**, S43–S59 (2017).
- 1137 65. Lanzós, A. *et al.* Discovery of Cancer Driver Long Noncoding RNAs across 1112  
1138 Tumour Genomes: New Candidates and Distinguishing Features. *Sci Rep* **7**, 41544  
1139 (2017).
- 1140 66. Rentzsch, P., Witten, D., Cooper, G. M., Shendure, J. & Kircher, M. CADD: predicting  
1141 the deleteriousness of variants throughout the human genome. *Nucleic Acids Research*  
1142 **47**, (2019).
- 1143 67. Wang, L. *et al.* CPAT: Coding-Potential Assessment Tool using an alignment-free  
1144 logistic regression model. *Nucleic Acids Res* **41**, e74 (2013).
- 1145 68. Tokheim, C. J., Papadopoulos, N., Kinzler, K. W., Vogelstein, B. & Karchin, R. Evaluating  
1146 the Evaluation of Cancer Driver Genes. (2016) doi:10.1101/060426.
- 1147 69. Siepel, A. *et al.* Evolutionarily conserved elements in vertebrate, insect, worm, and yeast  
1148 genomes. *Genome Research* **15**, 1034–1050 (2005).
- 1149 70. Haeussler, M. *et al.* The UCSC Genome Browser database: 2019 update. *Nucleic Acids*  
1150 *Research* **47**, D853–D858 (2019).
- 1151 71. Yanai, I. *et al.* Genome-wide midrange transcription profiles reveal expression level  
1152 relationships in human tissue specification. *Bioinformatics* **21**, 650–659 (2005).
- 1153 72. Paraskevopoulou, M. D. *et al.* DIANA-LncBase v2: indexing microRNA targets on non-  
1154 coding transcripts. *Nucleic Acids Research* **44**, D231–D238 (2015).
- 1155 73. Li, Y. *et al.* LncMAP: Pan-cancer atlas of long noncoding RNA-mediated transcriptional  
1156 network perturbations. *Nucleic Acids Research* **46**, 1113–1123 (2018).
- 1157 74. Buniello, A. *et al.* The NHGRI-EBI GWAS Catalog of published genome-wide  
1158 association studies, targeted arrays and summary statistics 2019. *Nucleic Acids*  
1159 *Research* **47**, D1005–D1012 (2019).
- 1160 75. Abbott, K. L. *et al.* The Candidate Cancer Gene Database: a database of cancer driver  
1161 genes from forward genetic screens in mice. *Nucleic Acids Research* **43**, D844–D848  
1162 (2015).
- 1163 76. Quinlan, A. R. & Hall, I. M. BEDTools: a flexible suite of utilities for comparing genomic  
1164 features. *Bioinformatics* **26**, 841–842 (2010).
- 1165 77. Guillen-Ramirez, H. A. & Johnson, R. ezTracks v0.1.0. (2021)  
1166 doi:10.5281/ZENODO.4749431.
- 1167 78. Seemann, S. E. *et al.* The identification and functional annotation of RNA structures  
1168 conserved in vertebrates. *Genome Research* **27**, 1371–1383 (2017).
- 1169 79. Sentürk Cetin, N. *et al.* Isolation and genome-wide characterization of cellular DNA:RNA  
1170 triplex structures. *Nucleic Acids Research* **47**, 2306–2321 (2019).
- 1171 80. Sanz, L. A. *et al.* Prevalent, Dynamic, and Conserved R-Loop Structures Associate with  
1172 Specific Epigenomic Signatures in Mammals. *Molecular Cell* **63**, 167–178 (2016).
- 1173 81. Kent, W. J. *et al.* The human genome browser at UCSC. *Genome Res* **12**, 996–1006  
1174 (2002).

- 1175 82. Davis, C. A. *et al.* The Encyclopedia of DNA elements (ENCODE): Data portal update.  
1176 *Nucleic Acids Research* **46**, D794–D801 (2018).
- 1177 83. Paz, I., Kosti, I., Ares, M., Cline, M. & Mandel-Gutfreund, Y. RBPmap: a web server for  
1178 mapping binding sites of RNA-binding proteins. *Nucleic Acids Research* **42**, W361–  
1179 W367 (2014).
- 1180 84. Cook, K. B., Kazan, H., Zuberi, K., Morris, Q. & Hughes, T. R. RBPDB: a database of  
1181 RNA-binding specificities. *Nucleic Acids Research* **39**, D301–D308 (2011).
- 1182 85. Miladi, M., Raden, M., Diederichs, S. & Backofen, R. MutaRNA: analysis and  
1183 visualization of mutation-induced changes in RNA structure. *Nucleic Acids Research*  
1184 **48**, W287–W291 (2020).
- 1185 86. Sabarinathan, R. *et al.* RNAsnp: Efficient Detection of Local RNA Secondary Structure  
1186 Changes Induced by SNPs. *Human Mutation* **34**, 546–556 (2013).
- 1187 87. Sanson, K. R. *et al.* Optimized libraries for CRISPR-Cas9 genetic screens with multiple  
1188 modalities. *Nature Communications* **9**, 5416 (2018).
- 1189 88. Uhlen, M. *et al.* Tissue-based map of the human proteome. *Science (1979)* **347**,  
1190 1260419 (2015).
- 1191 89. Spiniello, M. *et al.* HyPR-MS for Multiplexed Discovery of MALAT1, NEAT1, and  
1192 NORAD lncRNA Protein Interactomes. *J Proteome Res* **17**, 3022–3038 (2018).
- 1193 90. Huang, J. *et al.* The long noncoding RNA NEAT1 promotes sarcoma metastasis by  
1194 regulating RNA splicing pathways. *Molecular Cancer Research* **18**, 1534–1544 (2020).
- 1195 91. West, J. A. *et al.* The long noncoding RNAs NEAT1 and MALAT1 bind active chromatin  
1196 sites. *Mol Cell* **55**, 791–802 (2014).
- 1197 92. Szklarczyk, D. *et al.* STRING v11: protein–protein association networks with increased  
1198 coverage, supporting functional discovery in genome-wide experimental datasets.  
1199 *Nucleic Acids Research* **47**, D607–D613 (2019).
- 1200
